# Supplementary material
Source: publisher figshare collection journal article supplement (https://acs.figshare.com/ndownloader/files/25395886)
Supplement: Supplementary file 1 [file 25395886]

# SUPPORTING INFORMATION

## **Cumulative sub-millisecond all-atom simulations of the temperature-induced coil-to-globule transition of poly(*N*-vinylcaprolactam) in aqueous solution**

Jonas Dittrich<sup>†,‡</sup>, Michael Kather<sup>#,Δ</sup>, Anna Holzberger<sup>#,Δ</sup>, Andrij Pich<sup>‡,#,Δ</sup>, Holger Gohlke<sup>\*,†,‡,§</sup>

<sup>†</sup>Institute for Pharmaceutical and Medicinal Chemistry, Heinrich Heine University Düsseldorf, 40225 Düsseldorf, Germany

<sup>‡</sup>Bioeconomy Science Center (BioSC), Forschungszentrum Jülich, 52425 Jülich, Germany

<sup>#</sup>DWI-Leibniz-Institute for Interactive Materials, RWTH Aachen University, 52056 Aachen, Germany

<sup>Δ</sup>Institute of Technical and Macromolecular Chemistry, RWTH Aachen University, 52074 Aachen, Germany

<sup>§</sup>John von Neumann Institute for Computing (NIC), Jülich Supercomputing Centre (JSC), Institute of Biological Information Processing (IBI-7: Structural Biochemistry), Forschungszentrum Jülich GmbH, 52425 Jülich, Germany.

### Author ORCID

Jonas Dittrich: 0000-0003-2377-2268

Michael Kather: 0000-0001-6139-3483

Anna Holzberger: 0000-0002-9748-240X

Andrij Pich: 0000-0003-1825-7798

Holger Gohlke: 0000-0001-8613-1447

\*Corresponding Author: Holger Gohlke

Address: Universitätsstr. 1, 40225 Düsseldorf, Germany.

Phone: (+49) 211 81 13662; Fax: (+49) 211 81 13847

E-mail: gohlke@uni-duesseldorf.de

## Table of Contents

### Supplementary Figures..... 5

- Figure S1.** Cloud points were determined by measuring the absorption of the linear polymer in dependence of the temperature at various wavelengths. The first derivative was determined from these measurements, and the mean value of these peaks yields the respective cloud point. This example shows the cloud point determination of the 39mer at a polymer concentration of 0.3 wt.-%. .... 5
- Figure S2.** Implied timescale plot for HMMs constructed for five assumed hidden states (indicated by color) at different lag times up to 2.5 ns. The constructed HMM describes the coil-to-globule transition of a PNVCL 40mer at 293 K. It is constructed from 5x1  $\mu$ s MD simulation. Errors are calculated using Bayesian error estimation and are depicted as corresponding error area. The maximum likelihood result is depicted as solid lines, and the dashed lines show the ensemble mean based on a Bayesian sampling procedure. Calculations were performed with the PyEMMA<sup>1</sup> python library (v. 2.5.6)..... 6
- Figure S3.** Implied timescale plot for HMMs constructed for five assumed hidden states (indicated by color) at different lag times up to 1 ns. The constructed HMM describes the coil-to-globule transition of a PNVCL 40mer at 313 K. The HMM is constructed from 5x1  $\mu$ s MD simulation data. Errors are calculated using Bayesian error estimation and are depicted as corresponding error area. The maximum likelihood result is depicted as solid lines, and the dashed lines show the ensemble mean based on a Bayesian sampling procedure. Calculations were performed with the PyEMMA<sup>1</sup> python library (v. 2.5.6).. 6
- Figure S4:** Implied timescales (**A,C**) and timescale separation (**B,D**) of MSMs constructed from 5x1  $\mu$ s MD simulation of the coil-to-globule transition of a PNVCL 40mer at 293 K (**A,B**) and 313 K (**C,D**). The MSMs were constructed with a lag time of 2.5 ns and 1 ns for 293 K and 313 K, respectively. We consider two/three hidden states as there are gaps between the first and second (**B**) and between the second and third (**D**) relaxation timescale for 293 K and 313 K, respectively. Calculations were performed with the PyEMMA<sup>1</sup> python library (v. 2.5.6)..... 7
- Figure S5.** Chapman-Kolmogorov test for the constructed HMM describing the coil-to-globule transition of a PNVCL 40mer at 293 K (**A**) and 313 K (**B**). The HMMs are constructed from 5x1  $\mu$ s MD simulation data each. Estimated state transition probabilities and corresponding errors (at a 95 % confidence level) are depicted as dotted blue lines and error areas, respectively. Calculations were performed with the PyEMMA<sup>1</sup> python library (v. 2.5.6). In panel (B), black and blue lines lie on top of each other..... 8
- Figure S6.** Multi-conformer single point charge fit for methyl-capped *N*-(vinylcaprolactam) monomeric units. The charges were calculated at the HF/6-31G\* level using Gaussian09<sup>2</sup>. Charge fitting was done using the RESP charge fitting procedure implemented in antechamber.<sup>3</sup> The mean value is depicted as dotted horizontal line, and the standard error is shown by error bars. The inset depicts an *N*-(vinylcaprolactam) monomeric unit with partial charges mapped onto the molecular surface. .... 9
- Figure S7.** Energy components of  $T\Delta S_{config}$  computed with MM-PBSA for the coil-to-globule transition of a PNVCL 40mer in water at 293 K (hatched) and at 313 K (solid). The bar depicts  $TS_{\{rot, vib\}, globule} - TS_{\{rot, vib\}, coil}$ . The difference in entropy for the coil-to-globule transition is mainly dominated by the loss in vibrational entropy. It is a result of both a higher number of configurational degrees of freedom of the coil state and the presence of a compact state of PNVCL at 313 K. Mean values were computed from ten MM-PBSA calculations of 100 MD snapshots of PNVCL in either coil or globule conformation; the

error is calculated following the laws of error propagation using the respective standard error of the mean. Calculations were performed using MMPBSA.py<sup>4</sup>. .... 10

**Figure S8.** Energy components of  $\Delta G_{\text{solv}}$  computed with MM-PBSA for the coil-to-globule transition of a PNVCL 40mer in water at 293 K (hatched) and at 313 K (solid). The bar depicts  $G_{\{\text{pol, cavity, dispersion}\}, \text{globule}} - G_{\{\text{pol, cavity, dispersion}\}, \text{coil}}$ . Mean values were computed from ten MM-PBSA calculations of 100 MD snapshots of PNVCL in either coil or globule conformation; the error is calculated following the laws of error propagation using the respective standard error of the mean. Calculations were performed using MMPBSA.py<sup>4</sup>. .... 11

**Figure S9.** Energy components of  $\Delta E_{\text{MM}}$  computed with MM-PBSA for the coil-to-globule transition of a PNVCL 40mer in water at 293 K (hatched) and at 313 K (solid). The bar depicts  $E_{\{\text{bond, angle, dihedral, vdW, eel, 1-4 vdW, 1-4 eel}\}, \text{globule}} - E_{\{\text{bond, angle, dihedral, vdW, eel, 1-4 vdW, 1-4 eel}\}, \text{coil}}$ . Mean values were computed from ten MM-PBSA calculations of 100 MD snapshots of PNVCL in either coil or globule conformation; the error is calculated following the laws of error propagation using the respective standard error of the mean. Calculations were performed using MMPBSA.py<sup>4</sup>. .... 12

**Figure S10.** Atomwise energy decomposition of  $\Delta E_{\text{vdW}}$  (see Figure S9) for the coil-to-globule transition of an atactic PNVCL 40mer simulated under NVT conditions at 293 K (blue) and 313 K (red). The carbon atoms of the caprolactam ring, especially C<sub>3</sub> and C<sub>4</sub>, contribute to the favorable increase in  $\Delta E_{\text{vdW}}$  to a large extent, fostering the coil-to-globule transition at 293 K and even more at 313 K. .... 13

**Figure S11.** Atomwise energy decomposition of  $\Delta E_{\text{eel}}$  (see Figure S9) for the coil-to-globule transition of an atactic PNVCL 40mer simulated under NVT conditions at 293 K (blue) and 313 K (red). The unfavorable increase in the  $\Delta E_{\text{eel}}$  term for the lactam carbonyl carbon is outbalanced by a favorable interaction of the carbonyl oxygen, leading to a favorable contribution to the coil-to-globule transition at 313 K. .... 13

**Figure S12.** Running cumulative average of the potential energy of the 5x1  $\mu\text{s}$  NPT simulations (depicted by color) of the isotactic PNVCL 40mer at 293 K (A) and 313 K (B). The running cumulative averages of the potential energy of the pure water system (5x300 ns) are shown as black lines. The enthalpy of the polymer part of the polymer/water system is  $-161.9 \pm 3.3 \text{ kcal mol}^{-1}$  and  $-85.1 \pm 1.4 \text{ kcal mol}^{-1}$  at 293 K and 313 K, respectively. Therefore, the transition enthalpy  $\Delta H = 76.9 \pm 3.6 \text{ kcal mol}^{-1}$  for the 40mer, which is equivalent to  $1.92 \pm 0.56 \text{ kcal mol}^{-1}$  per repeating unit. .... 14

**Figure S13.** Running cumulative average of the potential energy of the 5x1  $\mu\text{s}$  NPT simulations (depicted by color) of the atactic PNVCL 40mer at 293 K (A) and 313 K (B). The running cumulative averages of the potential energy of the pure water system (5x300 ns) are shown as black lines. The enthalpy of the polymer part of the polymer/water system is  $-179.7 \pm 1.7 \text{ kcal mol}^{-1}$  and  $-101.7 \pm 2.6 \text{ kcal mol}^{-1}$  at 293 K and 313 K, respectively. Therefore, the transition enthalpy  $\Delta H = 78.0 \pm 3.1 \text{ kcal mol}^{-1}$  for the 40mer, which is equivalent to  $1.95 \pm 0.51 \text{ kcal mol}^{-1}$  per repeating unit. .... 15

**Figure S14.** Running cumulative average of the potential energy of the 5x1  $\mu\text{s}$  NPT simulations (depicted by color) of the syndiotactic PNVCL 40mer at 293 K (A) and 313 K (B). The running cumulative averages of the potential energy of the pure water system (5x300 ns) are shown as black lines. The enthalpy of the polymer part of the polymer/water system is  $-183.1 \pm 1.9 \text{ kcal mol}^{-1}$  and  $-96.4 \pm 0.9 \text{ kcal mol}^{-1}$  at 293 K and 313 K, respectively. Therefore, the transition enthalpy  $\Delta H = 86.6 \pm 2.1 \text{ kcal mol}^{-1}$  for the 40mer, which is equivalent to  $2.17 \pm 0.33 \text{ kcal mol}^{-1}$  per repeating unit. .... 16

- Figure S 15.** Running cumulative average of the potential energy of the 5x1  $\mu$ s NVT simulations (depicted by color) of the atactic PNVCL 40mer at 293 K (**A**) and 313 K (**B**). The running cumulative averages of the potential energy of the pure water system (5x100 ns) are depicted as black lines. The potential energy of the system is linearly dependent on the system's volume, indicating that the volume was not completely adjusted to the equilibrium value in the NPT step during thermalization. .... 17
- Figure S16.** Mean potential energies of pure water systems (**A,B**) and the atactic PNVCL 40mer (**C,D**) in water systems for MD simulations in the NVT ensemble at 293 K (**A,C**) and 313 K (**B,D**) as a function of the simulation box size for five independent replicas (depicted by color for the PNVCL). Green stars depict the interpolated potential energy of the system using the linear regression based on the five mean potential energies of the NVT simulations (determined parameters and statistics for the regression are displayed in each panel) and the mean volumes of the corresponding NPT simulations. The transition enthalpy is calculated according to eq. (7) of the main text and yields  $\Delta H = 1.98 \text{ kcal mol}^{-1}$  per repeating unit for the NVT ensemble. .... 18
- Figure S17.** Radius of gyration ( $R_g$ ) during five MD simulations of 1  $\mu$ s length of a syndiotactic PNVCL 50mer at 293 K for polymer concentrations of 1 wt.-%, 0.8 wt.-%, and 0.6 wt.-% (top to bottom). Corresponding frequency distributions are shown next to the time series in matching color, a frequency distribution of all data is shown as dashed black line.. 19
- Figure S18.** Radius of gyration ( $R_g$ ) during five MD simulations of 1  $\mu$ s length of a syndiotactic PNVCL 50mer at 313 K for polymer concentrations of 1 wt.-%, 0.8 wt.-%, and 0.6 wt.-% (top to bottom). Corresponding frequency distributions are shown next to the time series in matching color, a frequency distribution of all data is shown as dashed black line.. 20
- Figure S19.** Radius of gyration ( $R_g$ ) during five MD simulations of 1  $\mu$ s length of an isotactic PNVCL 50mer at 293 K for polymer concentrations of 1 wt.-%, 0.8 wt.-%, and 0.6 wt.-% (top to bottom). Corresponding frequency distributions are shown next to the time series in matching color, a frequency distribution of all data is shown as dashed black line..... 21
- Figure S20.** Radius of gyration ( $R_g$ ) during five MD simulations of 1  $\mu$ s length of an isotactic PNVCL 50mer at 313 K for polymer concentrations of 1 wt.-%, 0.8 wt.-%, and 0.6 wt.-% (top to bottom). Corresponding frequency distributions are shown next to the time series in matching color, a frequency distribution of all data is shown as dashed black line..... 22
- Figure S21.** Radius of gyration ( $R_g$ ) during five MD simulations of 1  $\mu$ s length of an atactic PNVCL 50mer at 293 K for polymer concentrations of 1 wt.-%, 0.8 wt.-%, and 0.6 wt.-% (top to bottom). Corresponding frequency distributions are shown next to the time series in matching color, a frequency distribution of all data is shown as dashed black line..... 23
- Figure S22.** Radius of gyration ( $R_g$ ) during five MD simulations of 1  $\mu$ s length of an atactic PNVCL 50mer at 313 K for polymer concentrations of 1 wt.-%, 0.8 wt.-%, and 0.6 wt.-% (top to bottom). Corresponding frequency distributions are shown next to the time series in matching color, a frequency distribution of all data is shown as dashed black line..... 24
- Figure S23.** Influence of different water models on the solvent-accessible surface area (SASA) of syndiotactic PNVCL oligomers. The histograms depict the SASA observed in five independent 1  $\mu$ s MD simulations for systems of PNVCL oligomers of varying length (30, 40, and 50 repeating units, from left to right) at different temperatures (293 K, 313K, and 343 K, from top to bottom) using the TIP3P water model (black) or the OPC water model (red). .... 25
- Figure S24.** Influence of different water models on the solvent-accessible surface area (SASA) of isotactic PNVCL oligomers. The histograms depict the SASA observed in five

|                                   |                                                                                                                                                                                                                                                                                                                                                                                                                                                                                                                                                                                                                                                                            |           |
|-----------------------------------|----------------------------------------------------------------------------------------------------------------------------------------------------------------------------------------------------------------------------------------------------------------------------------------------------------------------------------------------------------------------------------------------------------------------------------------------------------------------------------------------------------------------------------------------------------------------------------------------------------------------------------------------------------------------------|-----------|
|                                   | independent 1 $\mu$ s MD simulations for systems of PNVCL oligomers of varying length (30, 40, and 50 repeating units, from left to right) at different temperatures (293 K, 313K, and 343 K, from top to bottom) using the TIP3P water model (black) or the OPC water model (red). .....                                                                                                                                                                                                                                                                                                                                                                                  | 26        |
| <b>Figure S25.</b>                | Influence of different water models on the solvent-accessible surface area (SASA) of atactic PNVCL oligomers. The histograms depict the SASA observed in five independent 1 $\mu$ s MD simulations for systems of PNVCL oligomers of varying length (30, 40, and 50 repeating units, from left to right) at different temperatures (293 K, 313K, and 343 K, from top to bottom) using the TIP3P water model (black) or the OPC water model (red). .....                                                                                                                                                                                                                    | 27        |
| <b>Figure S26.</b>                | Influence of the MD ensemble (NVT / NPT) on the solvent-accessible surface area (SASA) of the iso-, syndio-, and atactic PNVCL 40mer. The histograms depict the SASA observed in five independent 1 $\mu$ s MD simulations for each tacticity of PNVCL (from left to right) at different temperatures (293 K and 313K, from top to bottom) using the NVT (black) or NPT (red) ensemble.....                                                                                                                                                                                                                                                                                | 28        |
| <b>Figure S27.</b>                | Influence of the MD ensemble (NVT / NPT) on the radius of gyration ( $R_g$ ) of the iso-, syndio-, and atactic PNVCL 40mer. (A, B)The histograms depict the $R_g$ observed in five independent 1 $\mu$ s MD simulations for each tacticity of PNVCL (from left to right) at different temperatures (293 K (A) and 313K (B), from top to bottom) using the NVT (black) or NPT (red) ensemble. (C, D) Histograms are obtained by removing one deviating trajectory from the five trajectories of the three systems showing notable deviations in panel A and B, respectively (atactic PNVCL (293 K, NPT), isotactic PNVCL (293 K, NPT), isotactic PNVCL (313 K, NVT)). ..... | 29        |
| <b>Figure S28.</b>                | Radial distribution functions (RDFs) for the polymer backbone carbons atoms of PNVCL (A) and PVP (B) and the oxygen of the surrounding water molecules. Atom pairings are depicted in respective colors, and RDFs calculated from trajectories at 293 K, and 313 K are shown as solid and dotted lines, respectively. Differences in the RDFs, $\Delta g(r) = g(r)_{313} - g(r)_{293}$ , are depicted in the plots below. Calculations were performed using CPPTRAJ <sup>5</sup> . .....                                                                                                                                                                                   | 30        |
| <b>Supplementary Tables .....</b> |                                                                                                                                                                                                                                                                                                                                                                                                                                                                                                                                                                                                                                                                            | <b>31</b> |
| <b>Table S1.</b>                  | Overview of performed simulations on poly( <i>N</i> -vinylcaprolactam) (PNVCL).....                                                                                                                                                                                                                                                                                                                                                                                                                                                                                                                                                                                        | 31        |
| <b>Table S2.</b>                  | Overview of performed simulations on poly( <i>N</i> -vinylpyrrolidone) (PVP): .....                                                                                                                                                                                                                                                                                                                                                                                                                                                                                                                                                                                        | 32        |
| <b>Table S3.</b>                  | Number of atoms within each investigated system. Polymer (PNVCL/PVP) and simulation conditions (NVT/NPT and TIP3P/OPC) are provided for each section, number of repeating units and tacticity are given per row. ....                                                                                                                                                                                                                                                                                                                                                                                                                                                      | 33        |
| <b>Table S4.</b>                  | Residues containing carbon atoms with inverted chirality for atactic structures of PNVCL and PVP.....                                                                                                                                                                                                                                                                                                                                                                                                                                                                                                                                                                      | 35        |
| <b>Table S5.</b>                  | Partial charges and coordinates of the atoms of the PNVCL repeating unit. The repeating unit possesses two open valences/connect records (C9 and C10), its net charge is zero. ....                                                                                                                                                                                                                                                                                                                                                                                                                                                                                        | 36        |
| <b>Table S6.</b>                  | Partial charges and coordinates of the atoms of the PVP repeating unit. The repeating unit possesses two open valences/connect records (C4 and C5); its net charge is zero. 36                                                                                                                                                                                                                                                                                                                                                                                                                                                                                             |           |
| <b>References .....</b>           |                                                                                                                                                                                                                                                                                                                                                                                                                                                                                                                                                                                                                                                                            | <b>37</b> |

## Supplementary Figures

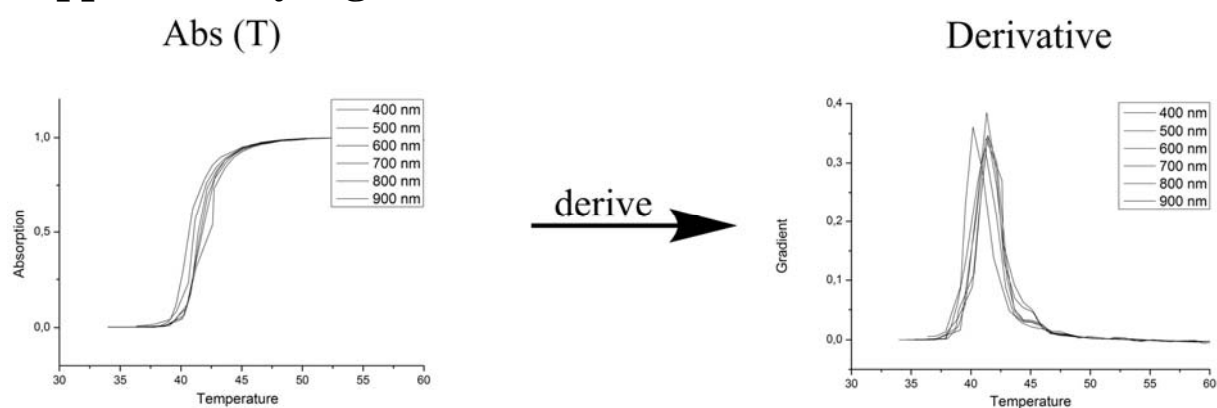

**Figure S1.** Cloud points were determined by measuring the absorption of the linear polymer in dependence of the temperature at various wavelengths. The first derivative was determined from these measurements, and the mean value of these peaks yields the respective cloud point. This example shows the cloud point determination of the 39mer at a polymer concentration of 0.3 wt.-%.

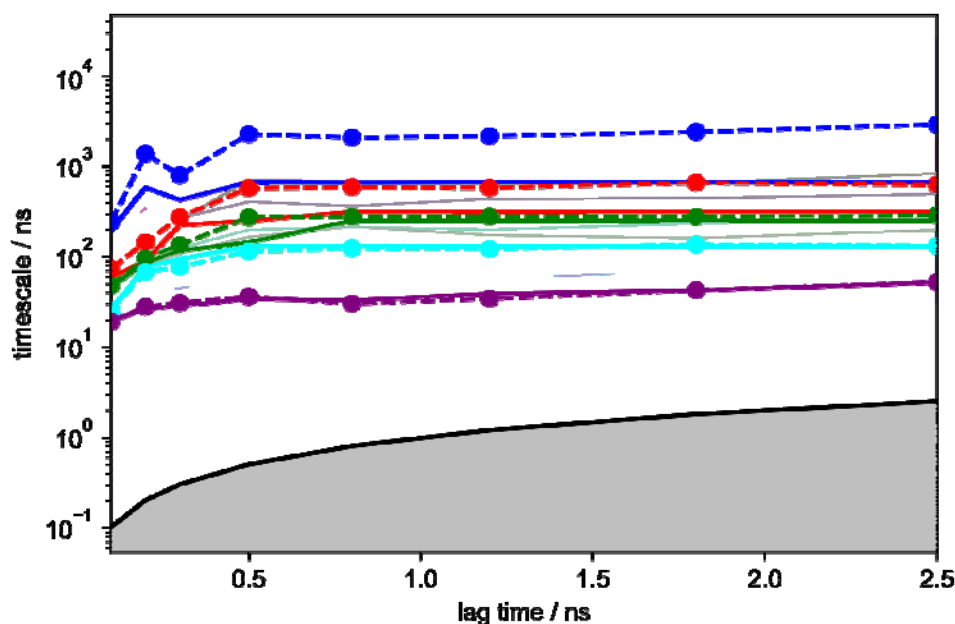

**Figure S2.** Implied timescale plot for HMMs constructed for five assumed hidden states (indicated by color) at different lag times up to 2.5 ns. The constructed HMM describes the coil-to-globule transition of a PNVCL 40mer at 293 K. It is constructed from 5x1  $\mu$ s MD simulation. Errors are calculated using Bayesian error estimation and are depicted as corresponding error area. The maximum likelihood result is depicted as solid lines, and the dashed lines show the ensemble mean based on a Bayesian sampling procedure. Calculations were performed with the PyEMMA<sup>1</sup> python library (v. 2.5.6).

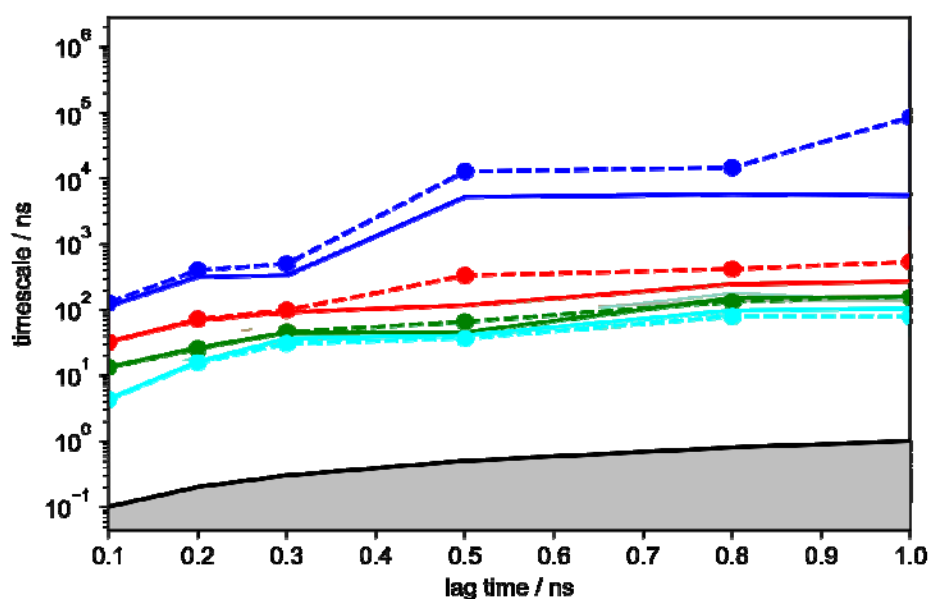

**Figure S3.** Implied timescale plot for HMMs constructed for five assumed hidden states (indicated by color) at different lag times up to 1 ns. The constructed HMM describes the coil-to-globule transition of a PNVCL 40mer at 313 K. The HMM is constructed from 5x1  $\mu$ s MD simulation data. Errors are calculated using Bayesian error estimation and are depicted as corresponding error area. The maximum likelihood result is depicted as solid lines, and the dashed lines show the ensemble mean based on a Bayesian sampling procedure. Calculations were performed with the PyEMMA<sup>1</sup> python library (v. 2.5.6).

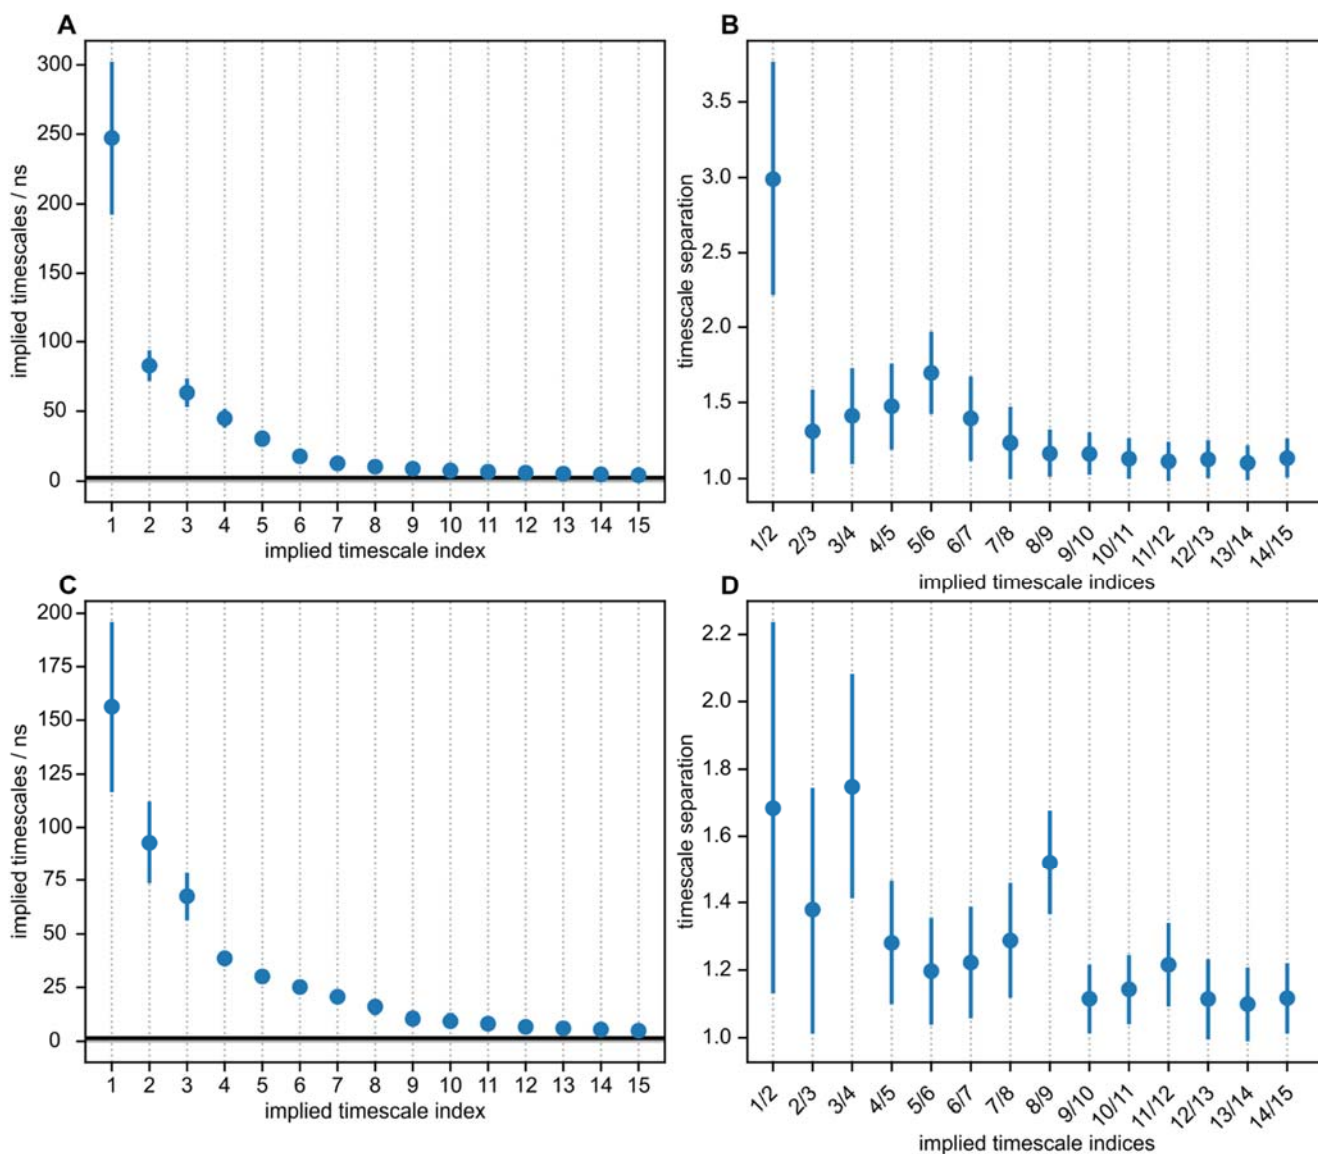

**Figure S4:** Implied timescales (A,C) and timescale separation (B,D) of MSMs constructed from 5x1  $\mu$ s MD simulation of the coil-to-globule transition of a PNVCL 40mer at 293 K (A,B) and 313 K (C,D). The MSMs were constructed with a lag time of 2.5 ns and 1 ns for 293 K and 313 K, respectively. We consider two/three hidden states as there are gaps between the first and second (B) and between the second and third (D) relaxation timescale for 293 K and 313 K, respectively. Calculations were performed with the PyEMMA<sup>1</sup> python library (v. 2.5.6).



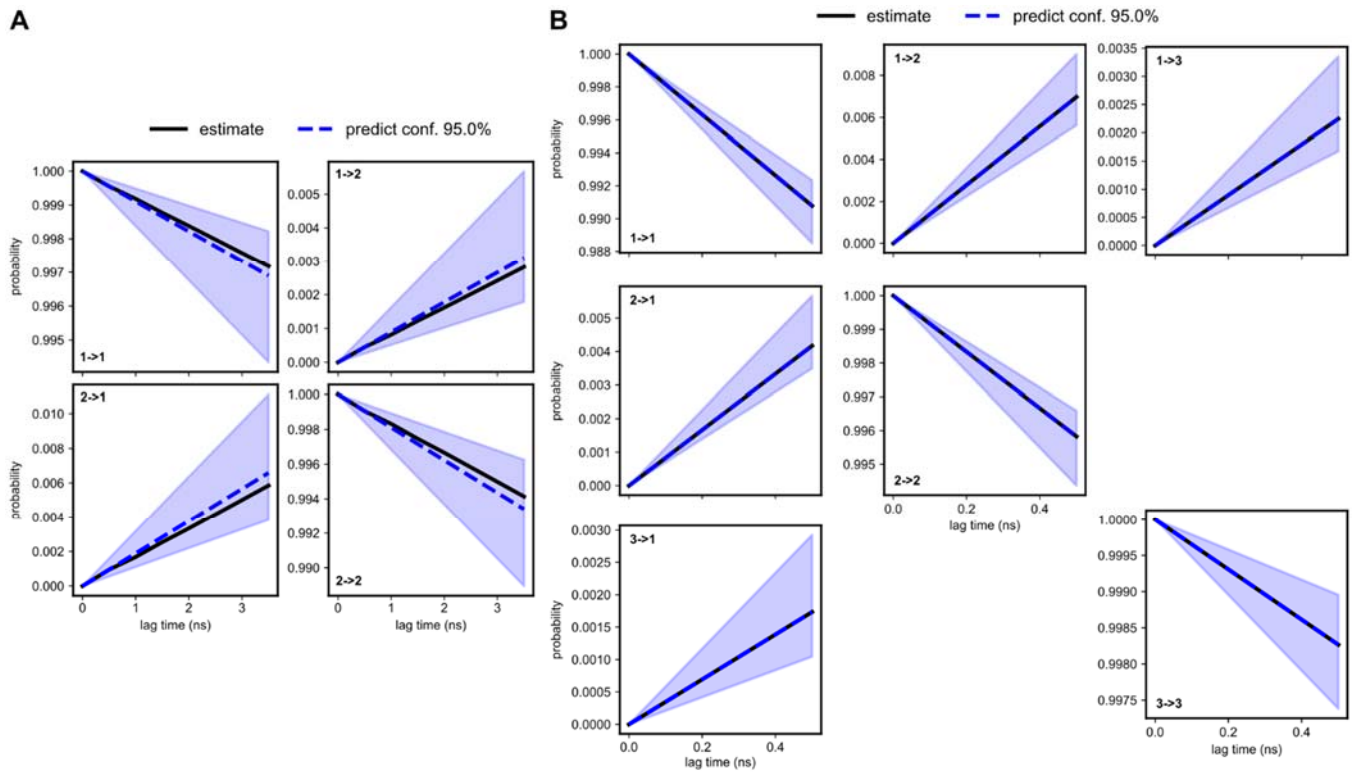

**Figure S5.** Chapman-Kolmogorov test for the constructed HMM describing the coil-to-globule transition of a PNVL 40mer at 293 K (**A**) and 313 K (**B**). The HMMs are constructed from 5x1  $\mu$ s MD simulation data each. Estimated state transition probabilities and corresponding errors (at a 95 % confidence level) are depicted as dotted blue lines and error areas, respectively. Calculations were performed with the PyEMMA<sup>1</sup> python library (v. 2.5.6). In panel (B), black and blue lines lie on top of each other.

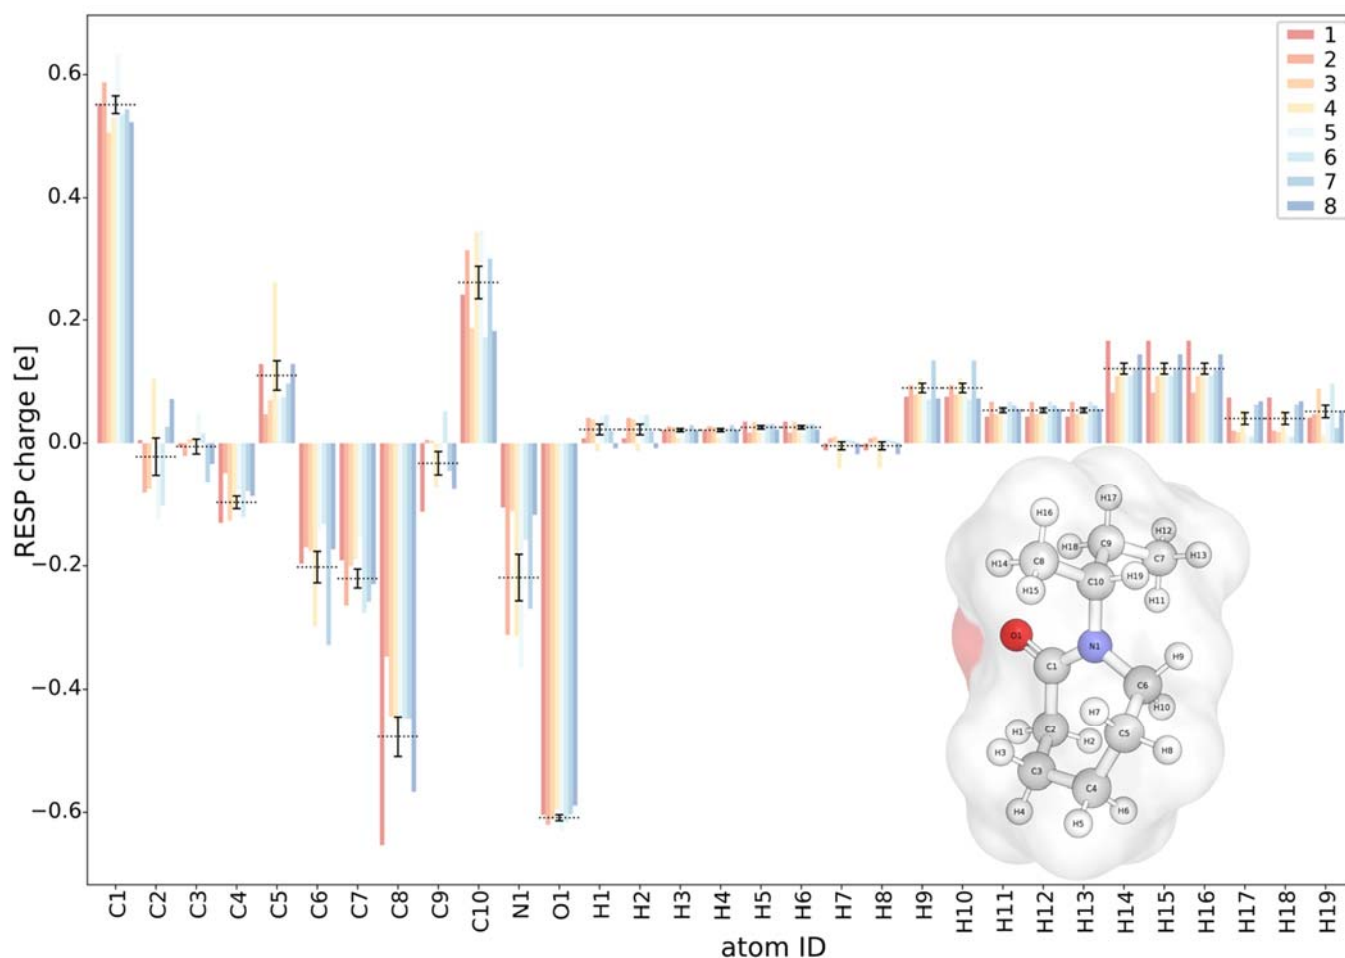

**Figure S6.** Multi-conformer single point charge fit for methyl-capped *N*-(vinylcaprolactam) monomeric units. The charges were calculated at the HF/6-31G\* level using Gaussian09<sup>2</sup>. Charge fitting was done using the RESP charge fitting procedure implemented in antechamber.<sup>3</sup> The mean value is depicted as dotted horizontal line, and the standard error is shown by error bars. The inset depicts an *N*-(vinylcaprolactam) monomeric unit with partial charges mapped onto the molecular surface.

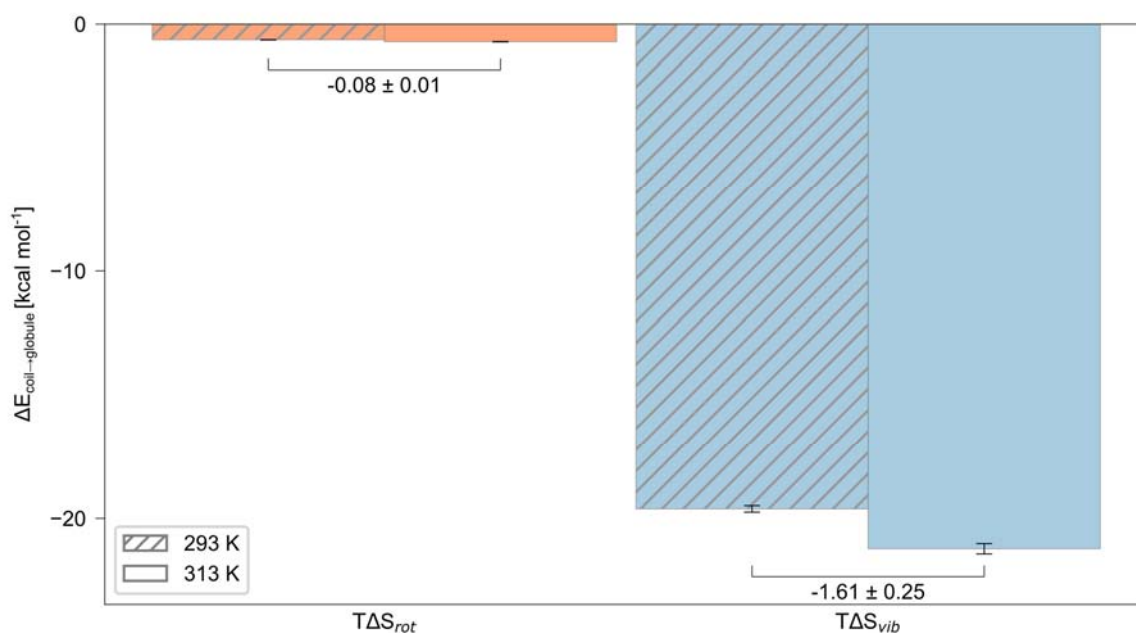

**Figure S7.** Energy components of  $T\Delta S_{config}$  computed with MM-PBSA for the coil-to-globule transition of a PNVCL 40mer in water at 293 K (hatched) and at 313 K (solid). The bar depicts  $TS_{\{rot, vib\}, globule} - TS_{\{rot, vib\}, coil}$ . The difference in entropy for the coil-to-globule transition is mainly dominated by the loss in vibrational entropy. It is a result of both a higher number of configurational degrees of freedom of the coil state and the presence of a compact state of PNVCL at 313 K. Mean values were computed from ten MM-PBSA calculations of 100 MD snapshots of PNVCL in either coil or globule conformation; the error is calculated following the laws of error propagation using the respective standard error of the mean. Calculations were performed using MMPBSA.py<sup>4</sup>.

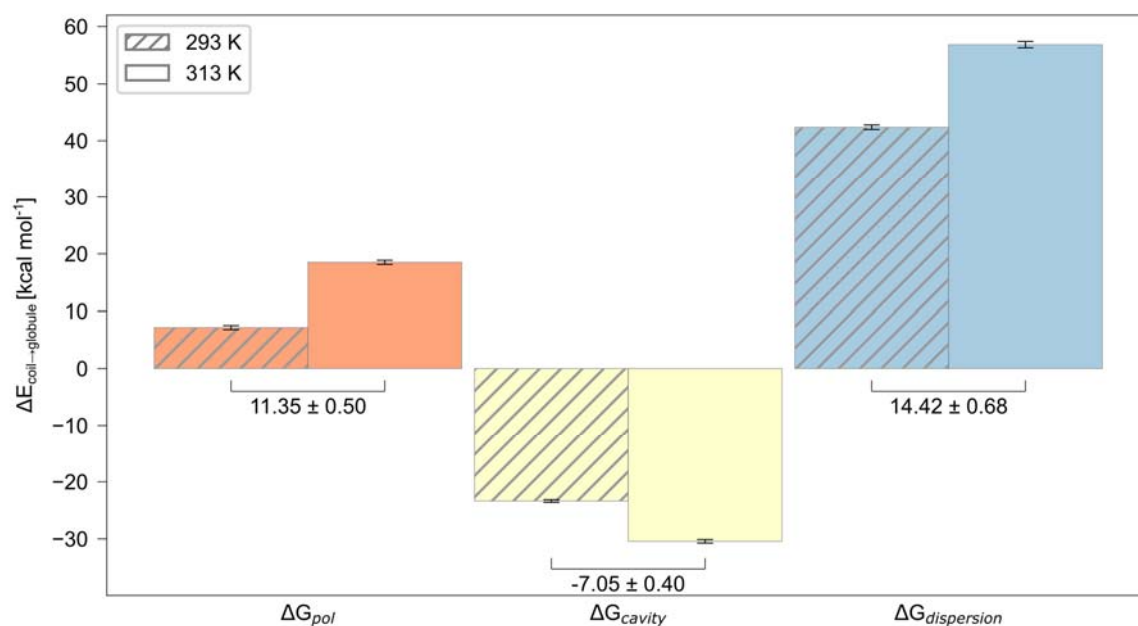

**Figure S8.** Energy components of  $\Delta G_{solv}$  computed with MM-PBSA for the coil-to-globule transition of a PNVCL 40mer in water at 293 K (hatched) and at 313 K (solid). The bar depicts  $G_{\{pol, cavity, dispersion\}, globule} - G_{\{pol, cavity, dispersion\}, coil}$ . Mean values were computed from ten MM-PBSA calculations of 100 MD snapshots of PNVCL in either coil or globule conformation; the error is calculated following the laws of error propagation using the respective standard error of the mean. Calculations were performed using MMPBSA.py<sup>4</sup>.

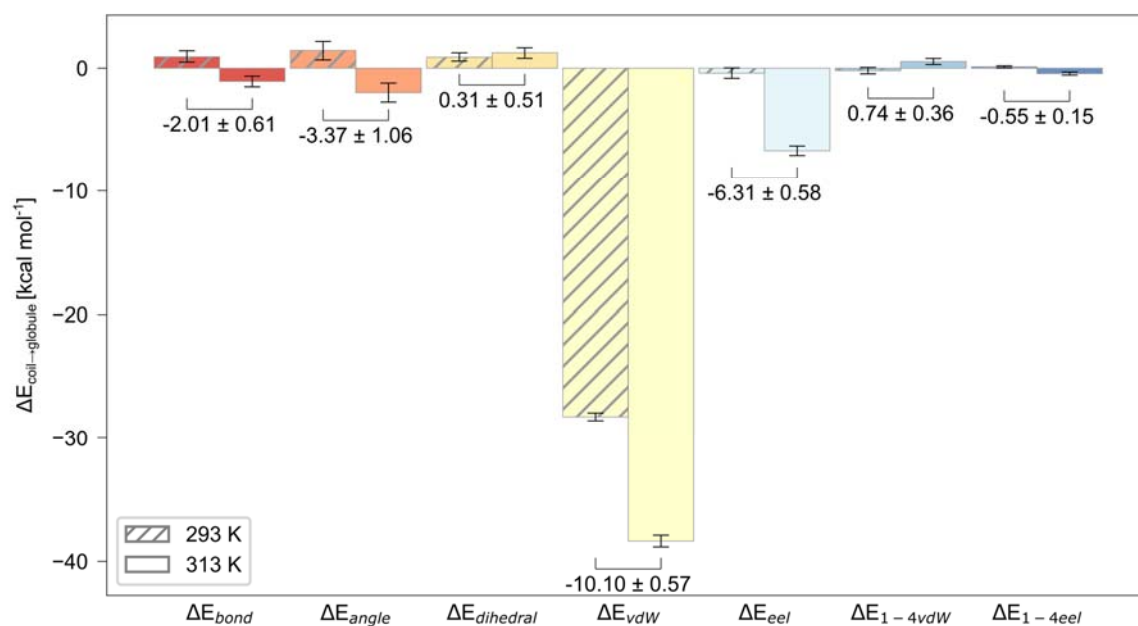

**Figure S9.** Energy components of  $\Delta E_{MM}$  computed with MM-PBSA for the coil-to-globule transition of a PNVCL 40mer in water at 293 K (hatched) and at 313 K (solid). The bar depicts  $E_{\{\text{bond, angle, dihedral, vdW, eel, 1-4 vdW, 1-4 eel}\}, \text{globule}} - E_{\{\text{bond, angle, dihedral, vdW, eel, 1-4 vdW, 1-4 eel}\}, \text{coil}}$ . Mean values were computed from ten MM-PBSA calculations of 100 MD snapshots of PNVCL in either coil or globule conformation; the error is calculated following the laws of error propagation using the respective standard error of the mean. Calculations were performed using MMPBSA.py<sup>4</sup>.

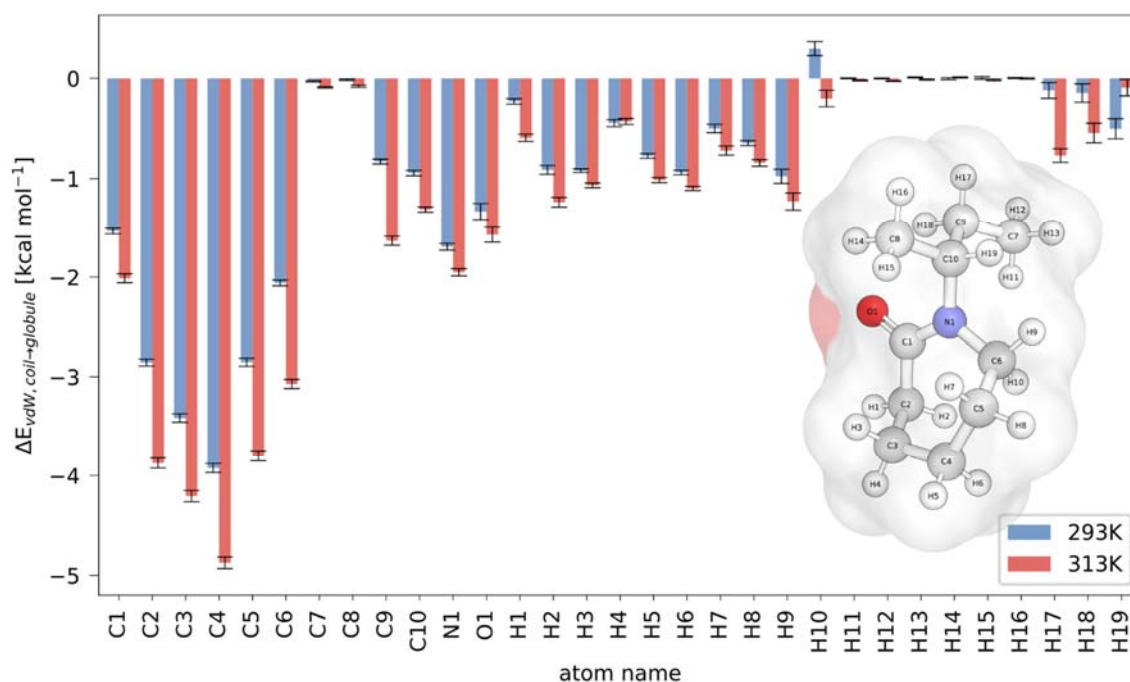

**Figure S10.** Atomwise energy decomposition of  $\Delta E_{vdW}$  (see Figure S9) for the coil-to-globule transition of an atactic PNVCL 40mer simulated under NVT conditions at 293 K (blue) and 313 K (red). The carbon atoms of the caprolactam ring, especially C<sub>3</sub> and C<sub>4</sub>, contribute to the favorable increase in  $\Delta E_{vdW}$  to a large extent, fostering the coil-to-globule transition at 293 K and even more at 313 K.

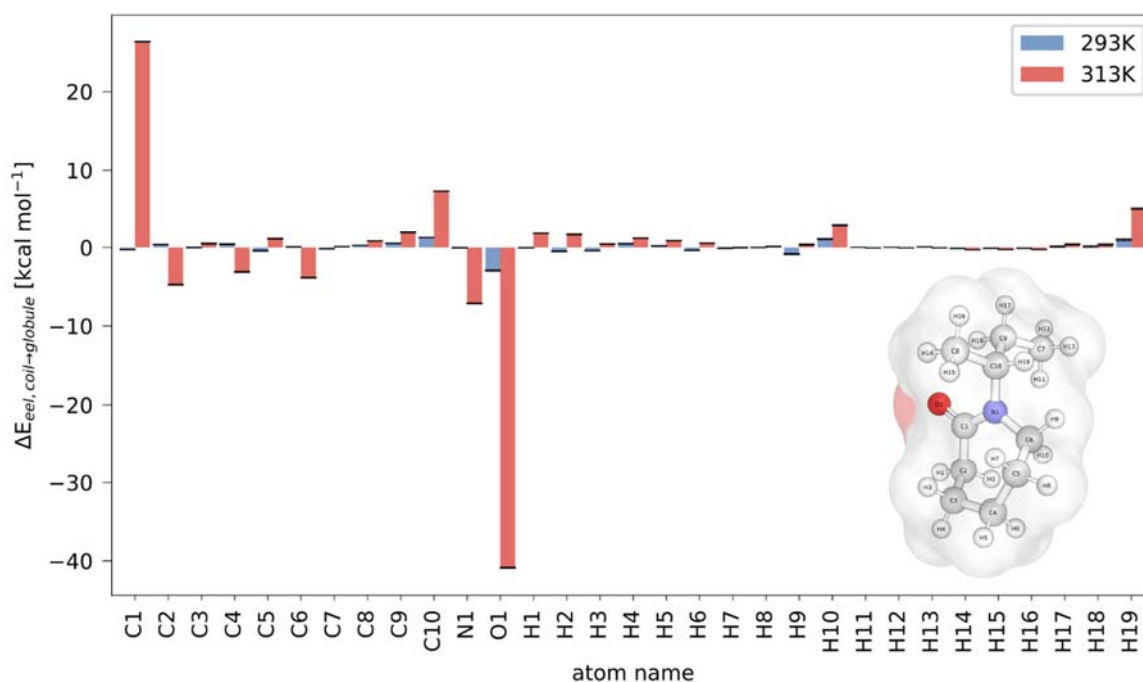

**Figure S11.** Atomwise energy decomposition of  $\Delta E_{eel}$  (see Figure S9) for the coil-to-globule transition of an atactic PNVCL 40mer simulated under NVT conditions at 293 K (blue) and 313 K (red). The unfavorable increase in the  $\Delta E_{eel}$  term for the lactam carbonyl carbon is outbalanced by a favorable interaction of the carbonyl oxygen, leading to a favorable contribution to the coil-to-globule transition at 313 K.

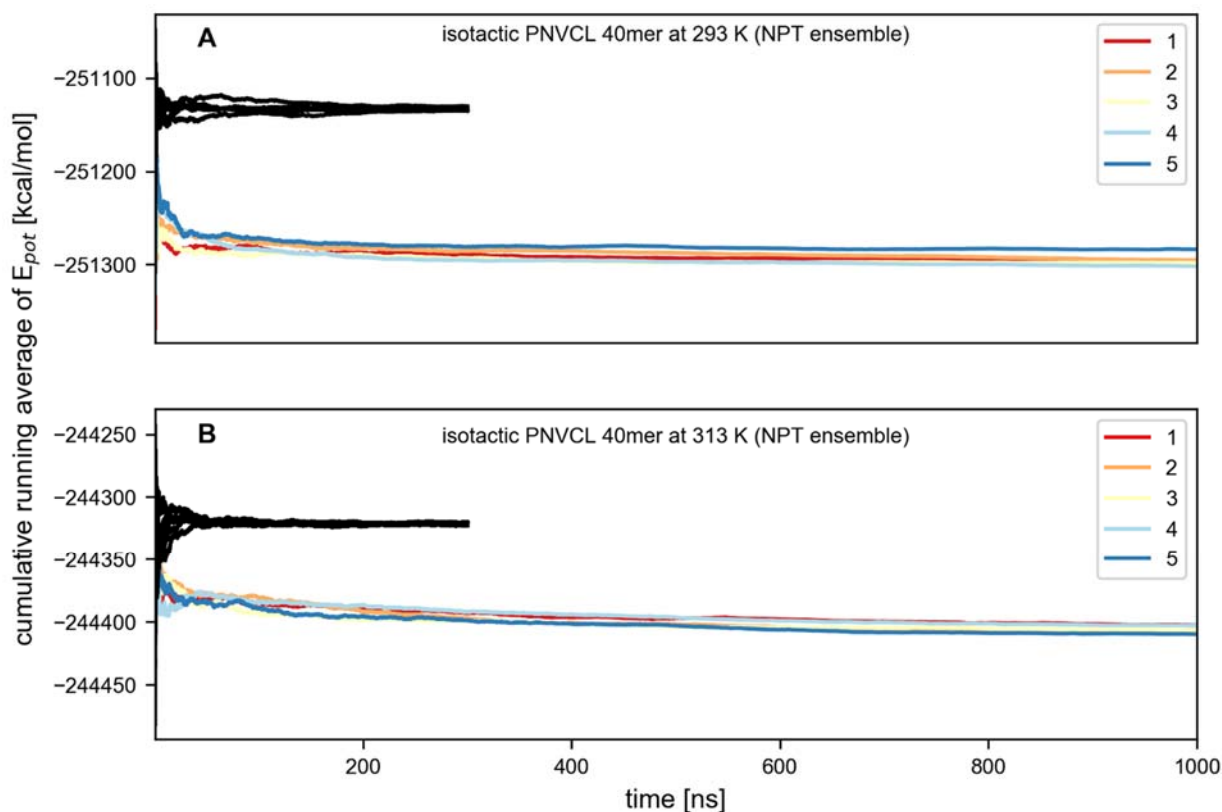

**Figure S12.** Running cumulative average of the potential energy of the 5x1  $\mu$ s NPT simulations (depicted by color) of the isotactic PNVCL 40mer at 293 K (**A**) and 313 K (**B**). The running cumulative averages of the potential energy of the pure water system (5x300 ns) are shown as black lines. The enthalpy of the polymer part of the polymer/water system is  $-161.9 \pm 3.3$  kcal mol $^{-1}$  and  $-85.1 \pm 1.4$  kcal mol $^{-1}$  at 293 K and 313 K, respectively. Therefore, the transition enthalpy  $\Delta H = 76.9 \pm 3.6$  kcal mol $^{-1}$  for the 40mer, which is equivalent to  $1.92 \pm 0.56$  kcal mol $^{-1}$  per repeating unit.

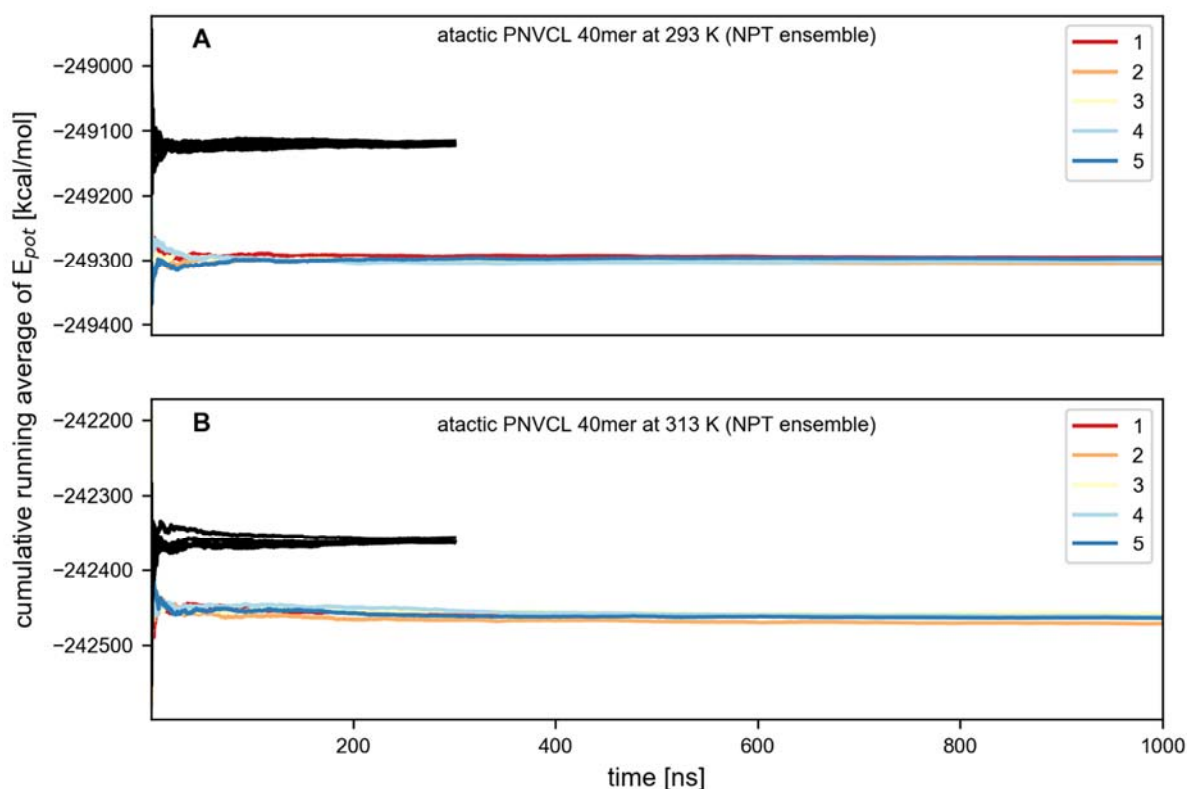

**Figure S13.** Running cumulative average of the potential energy of the 5x1  $\mu$ s NPT simulations (depicted by color) of the atactic PNVCL 40mer at 293 K (**A**) and 313 K (**B**). The running cumulative averages of the potential energy of the pure water system (5x300 ns) are shown as black lines. The enthalpy of the polymer part of the polymer/water system is  $-179.7 \pm 1.7$  kcal mol $^{-1}$  and  $-101.7 \pm 2.6$  kcal mol $^{-1}$  at 293 K and 313 K, respectively. Therefore, the transition enthalpy  $\Delta H = 78.0 \pm 3.1$  kcal mol $^{-1}$  for the 40mer, which is equivalent to  $1.95 \pm 0.51$  kcal mol $^{-1}$  per repeating unit.



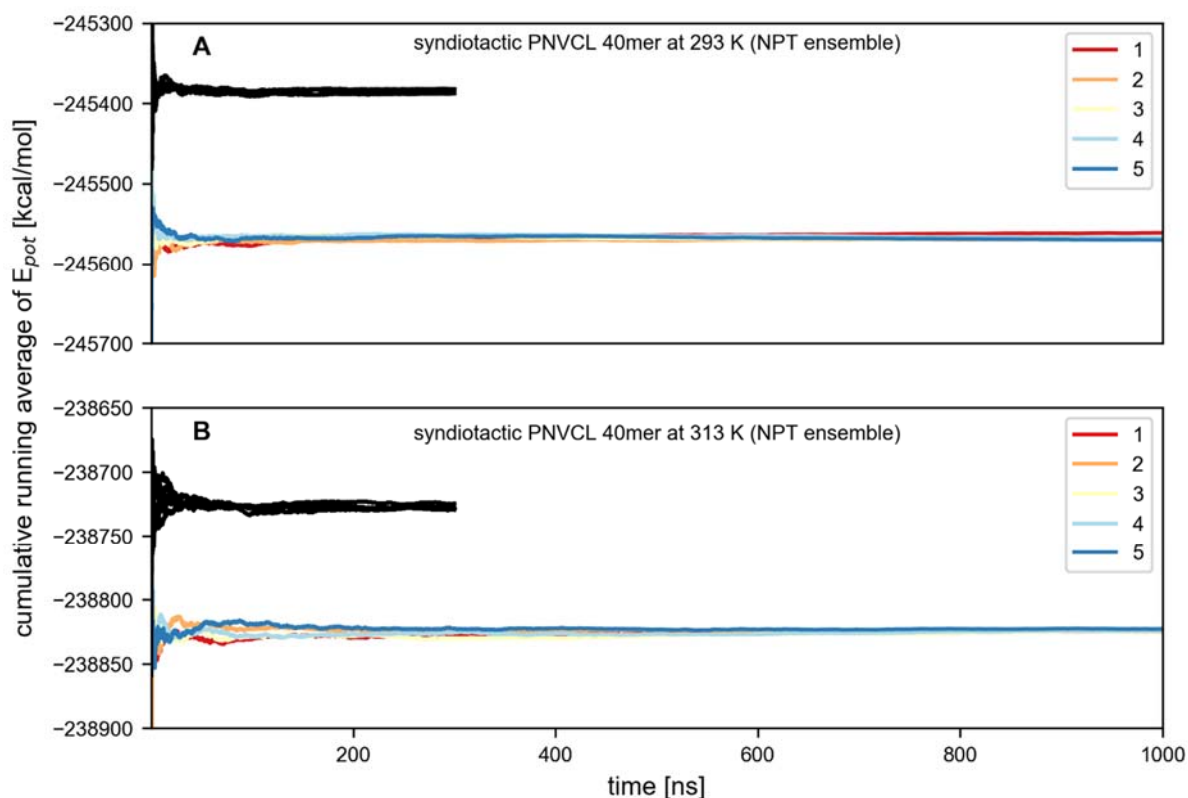

**Figure S14.** Running cumulative average of the potential energy of the 5x1  $\mu$ s NPT simulations (depicted by color) of the syndiotactic PNVCL 40mer at 293 K (**A**) and 313 K (**B**). The running cumulative averages of the potential energy of the pure water system (5x300 ns) are shown as black lines. The enthalpy of the polymer part of the polymer/water system is  $-183.1 \pm 1.9$  kcal mol<sup>-1</sup> and  $-96.4 \pm 0.9$  kcal mol<sup>-1</sup> at 293 K and 313 K, respectively. Therefore, the transition enthalpy  $\Delta H = 86.6 \pm 2.1$  kcal mol<sup>-1</sup> for the 40mer, which is equivalent to  $2.17 \pm 0.33$  kcal mol<sup>-1</sup> per repeating unit.

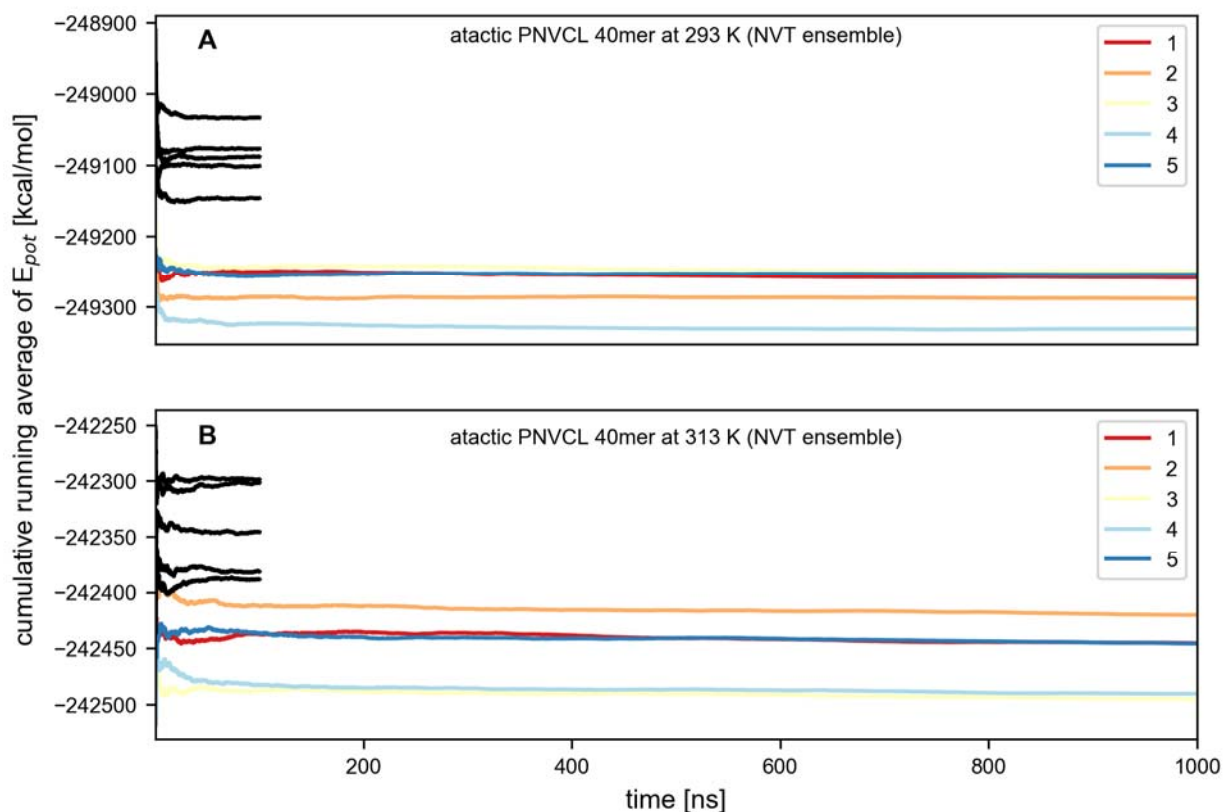

**Figure S 15.** Running cumulative average of the potential energy of the 5x1  $\mu$ s NVT simulations (depicted by color) of the atactic PNVCL 40mer at 293 K (**A**) and 313 K (**B**). The running cumulative averages of the potential energy of the pure water system (5x100 ns) are depicted as black lines. The potential energy of the system is linearly dependent on the system's volume, indicating that the volume was not completely adjusted to the equilibrium value in the NPT step during thermalization.

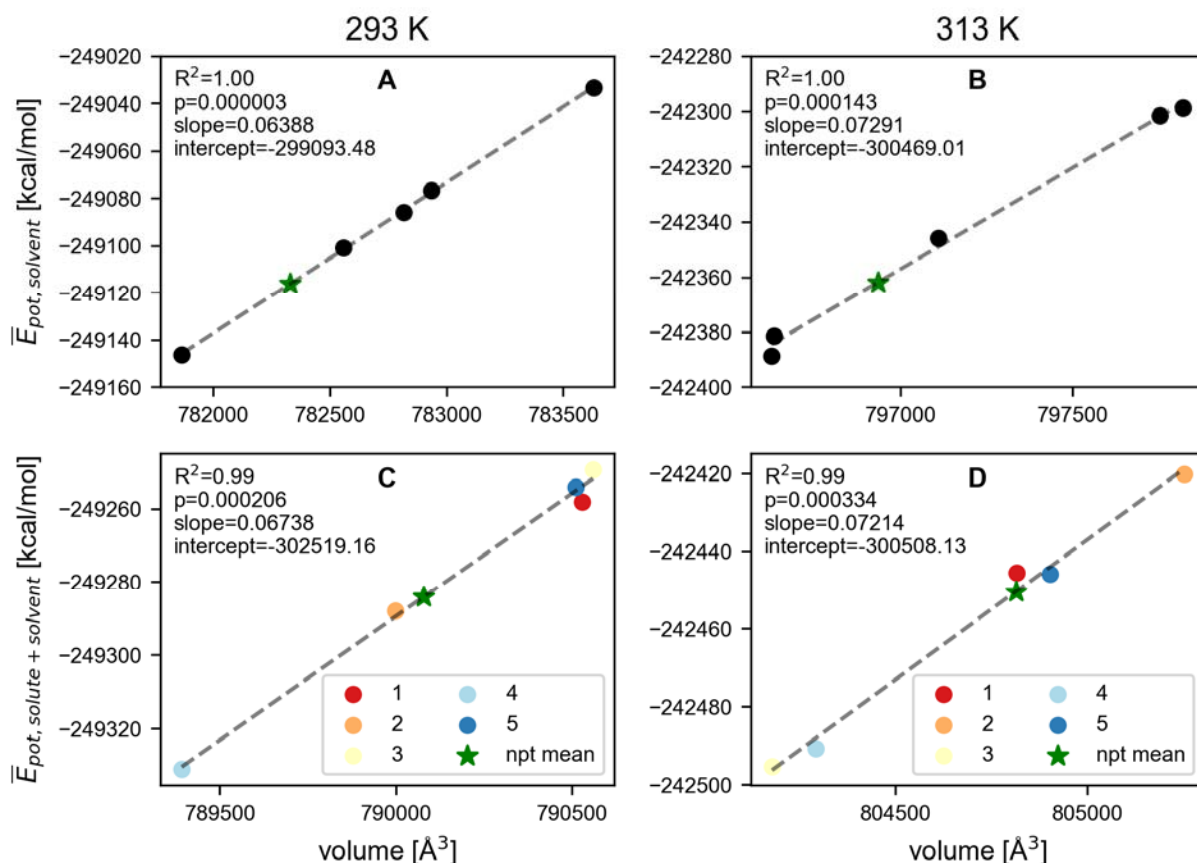

**Figure S16.** Mean potential energies of pure water systems (A,B) and the atactic PNVCL 40mer (C,D) in water systems for MD simulations in the NVT ensemble at 293 K (A,C) and 313 K (B,D) as a function of the simulation box size for five independent replicas (depicted by color for the PNVCL). Green stars depict the interpolated potential energy of the system using the linear regression based on the five mean potential energies of the NVT simulations (determined parameters and statistics for the regression are displayed in each panel) and the mean volumes of the corresponding NPT simulations. The transition enthalpy is calculated according to eq. (7) of the main text and yields  $\Delta H = 1.98 \text{ kcal mol}^{-1}$  per repeating unit for the NVT ensemble.

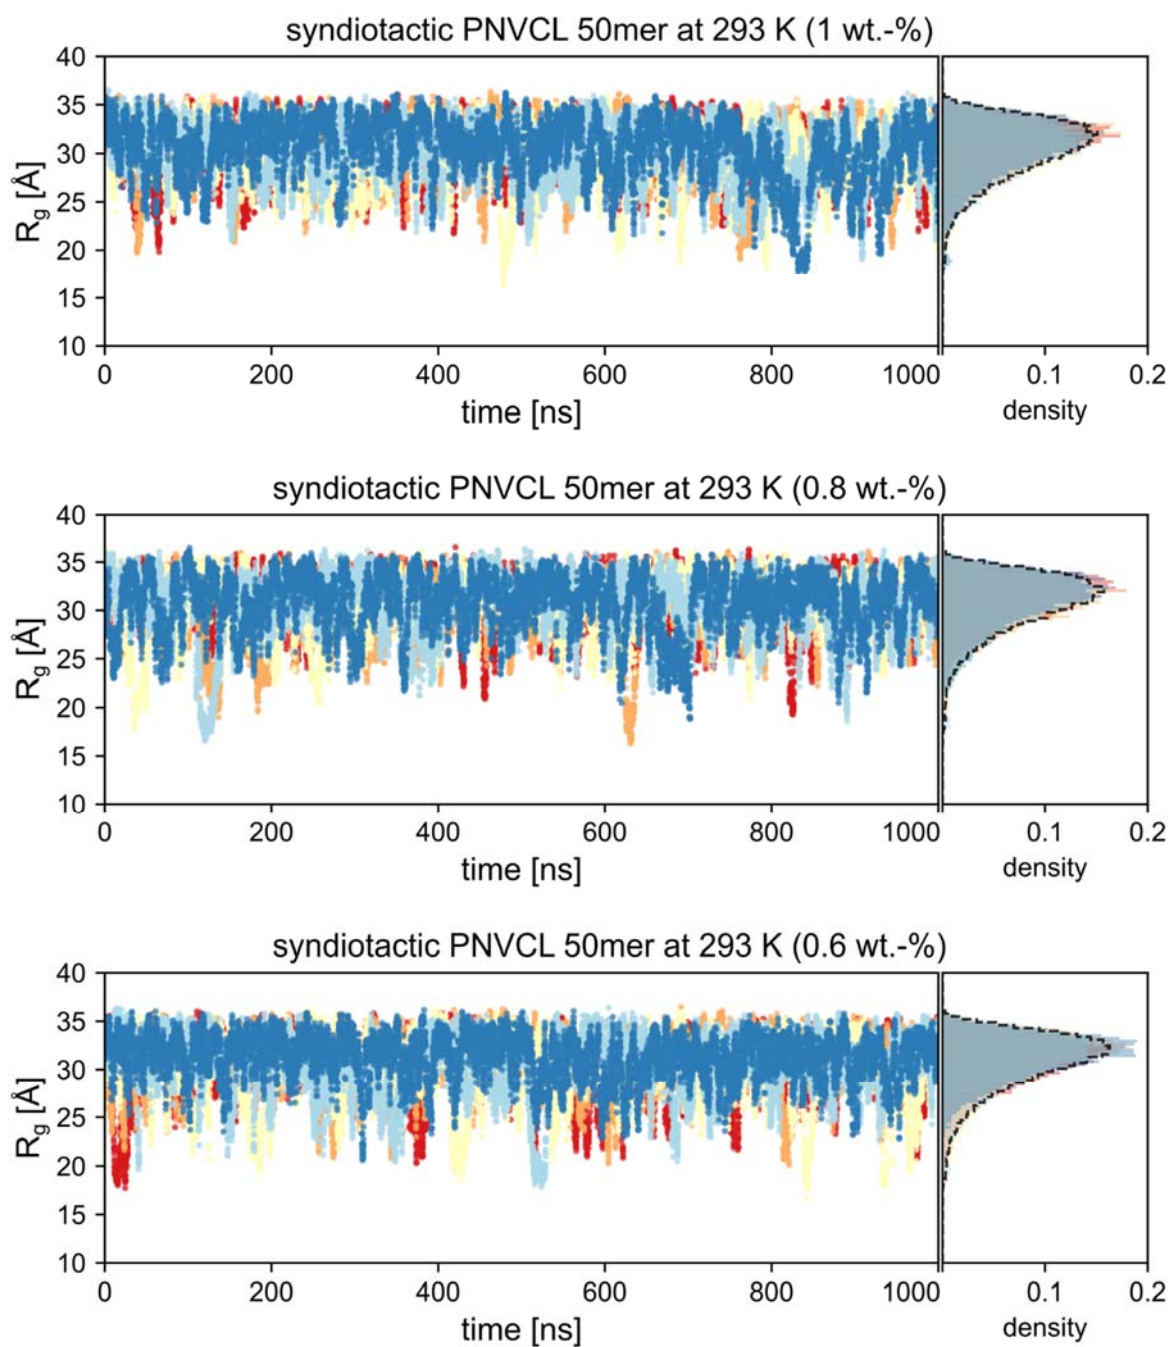

**Figure S17.** Radius of gyration ( $R_g$ ) during five MD simulations of 1  $\mu$ s length of a syndiotactic PNVCL 50mer at 293 K for polymer concentrations of 1 wt.-%, 0.8 wt.-%, and 0.6 wt.-% (top to bottom). Corresponding frequency distributions are shown next to the time series in matching color, a frequency distribution of all data is shown as dashed black line.

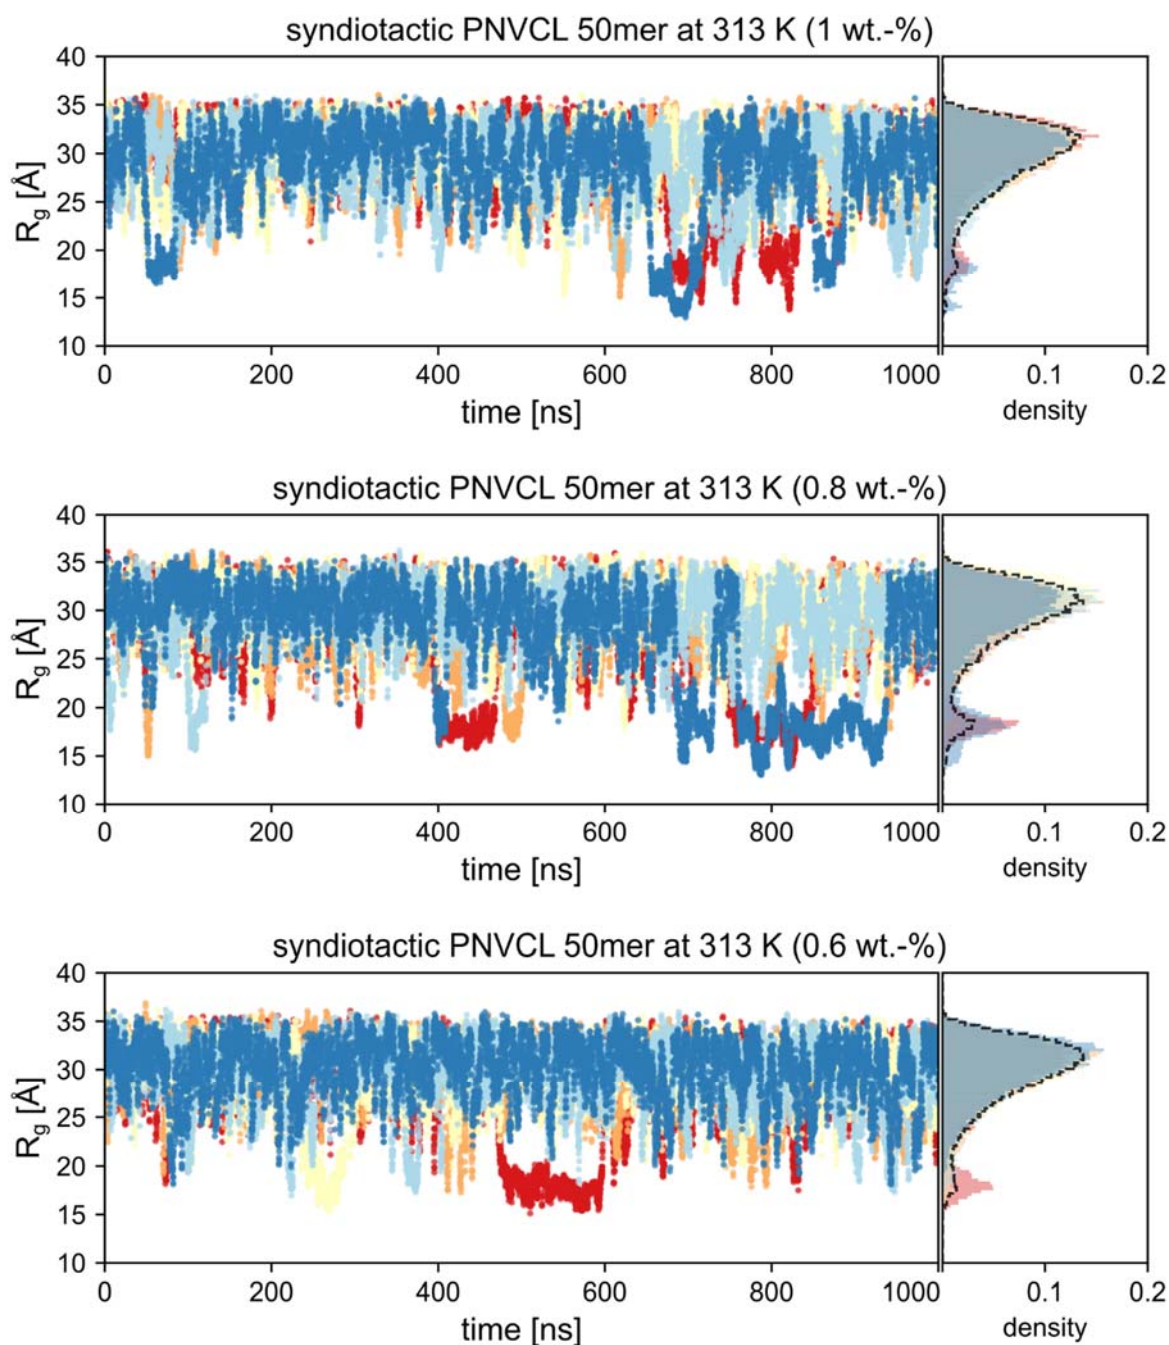

**Figure S18.** Radius of gyration ( $R_g$ ) during five MD simulations of 1  $\mu$ s length of a syndiotactic PNVCL 50mer at 313 K for polymer concentrations of 1 wt.-%, 0.8 wt.-%, and 0.6 wt.-% (top to bottom). Corresponding frequency distributions are shown next to the time series in matching color, a frequency distribution of all data is shown as dashed black line.



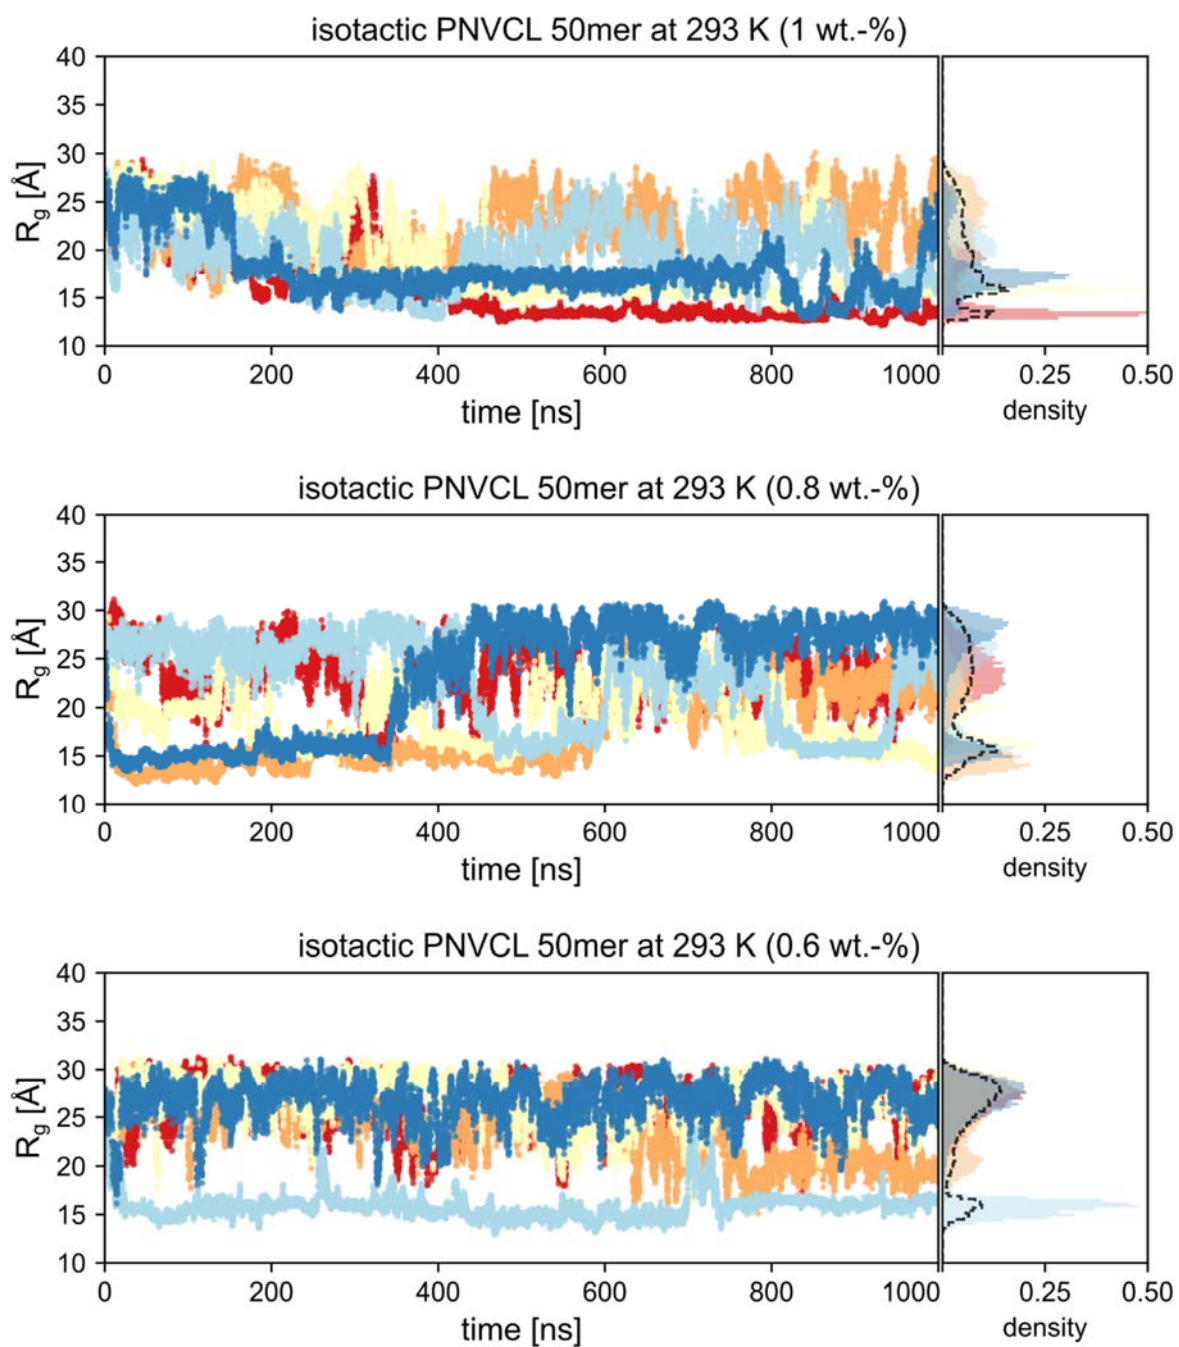

**Figure S19.** Radius of gyration ( $R_g$ ) during five MD simulations of 1  $\mu$ s length of an isotactic PNVCL 50mer at 293 K for polymer concentrations of 1 wt.-%, 0.8 wt.-%, and 0.6 wt.-% (top to bottom). Corresponding frequency distributions are shown next to the time series in matching color, a frequency distribution of all data is shown as dashed black line.

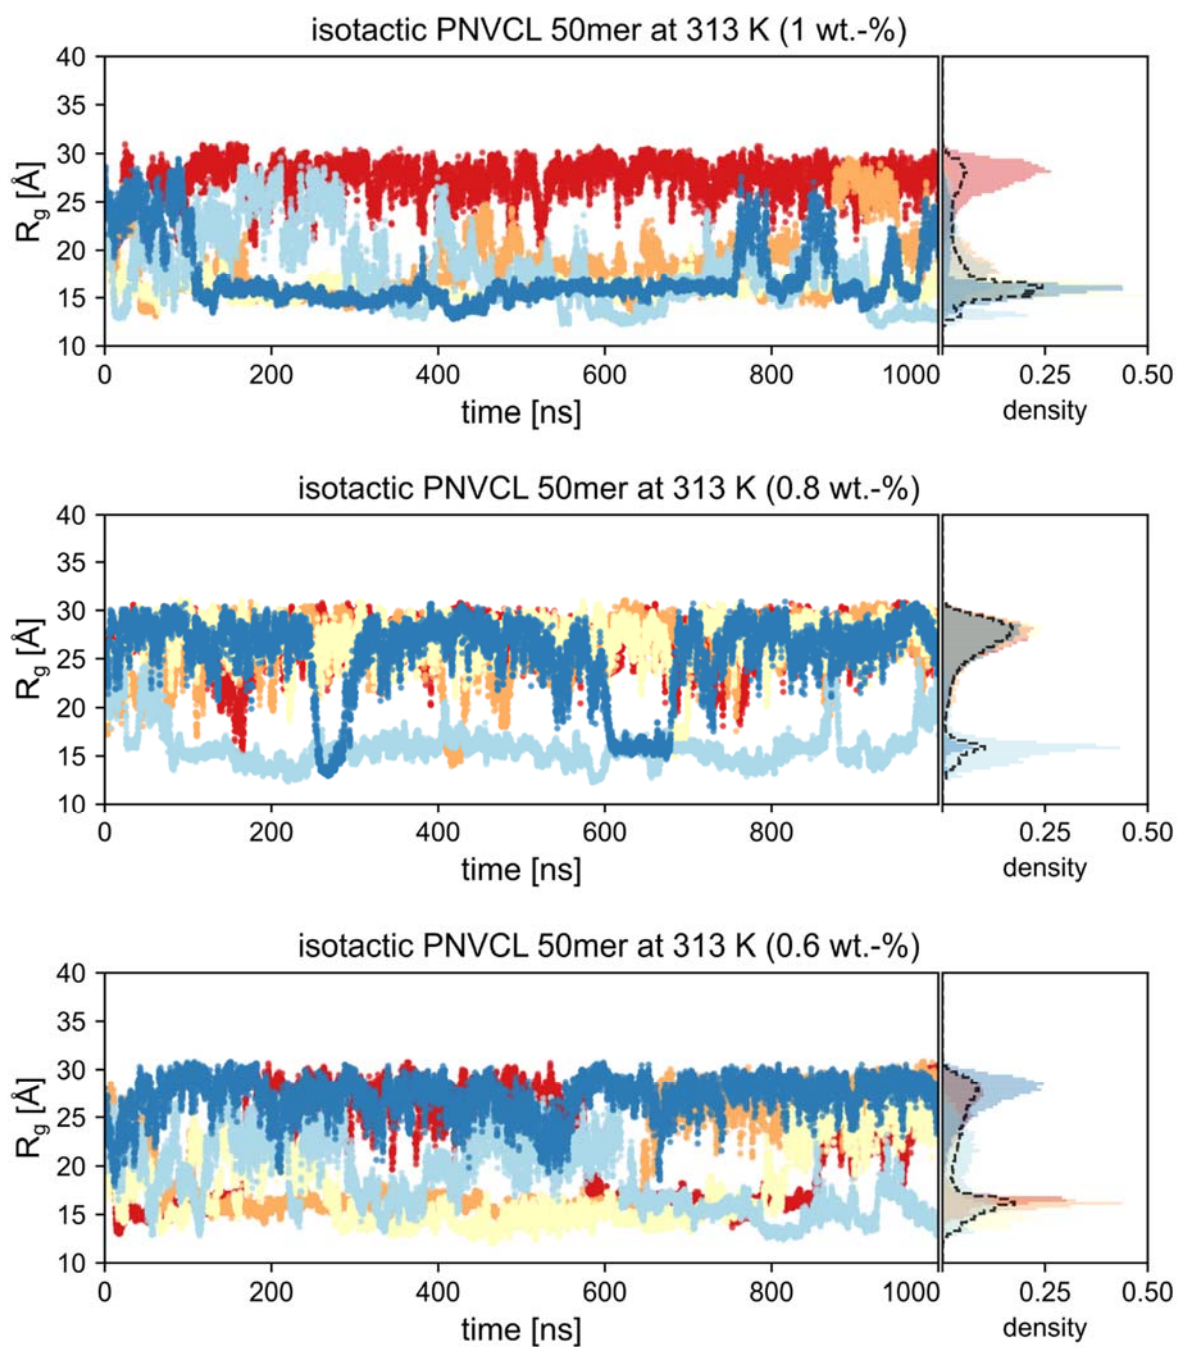

**Figure S20.** Radius of gyration ( $R_g$ ) during five-MD simulations of 1  $\mu$ s length of an isotactic PNVCL 50mer at 313 K for polymer concentrations of 1 wt.-%, 0.8 wt.-%, and 0.6 wt.-% (top to bottom). Corresponding frequency distributions are shown next to the time series in matching color, a frequency distribution of all data is shown as dashed black line.

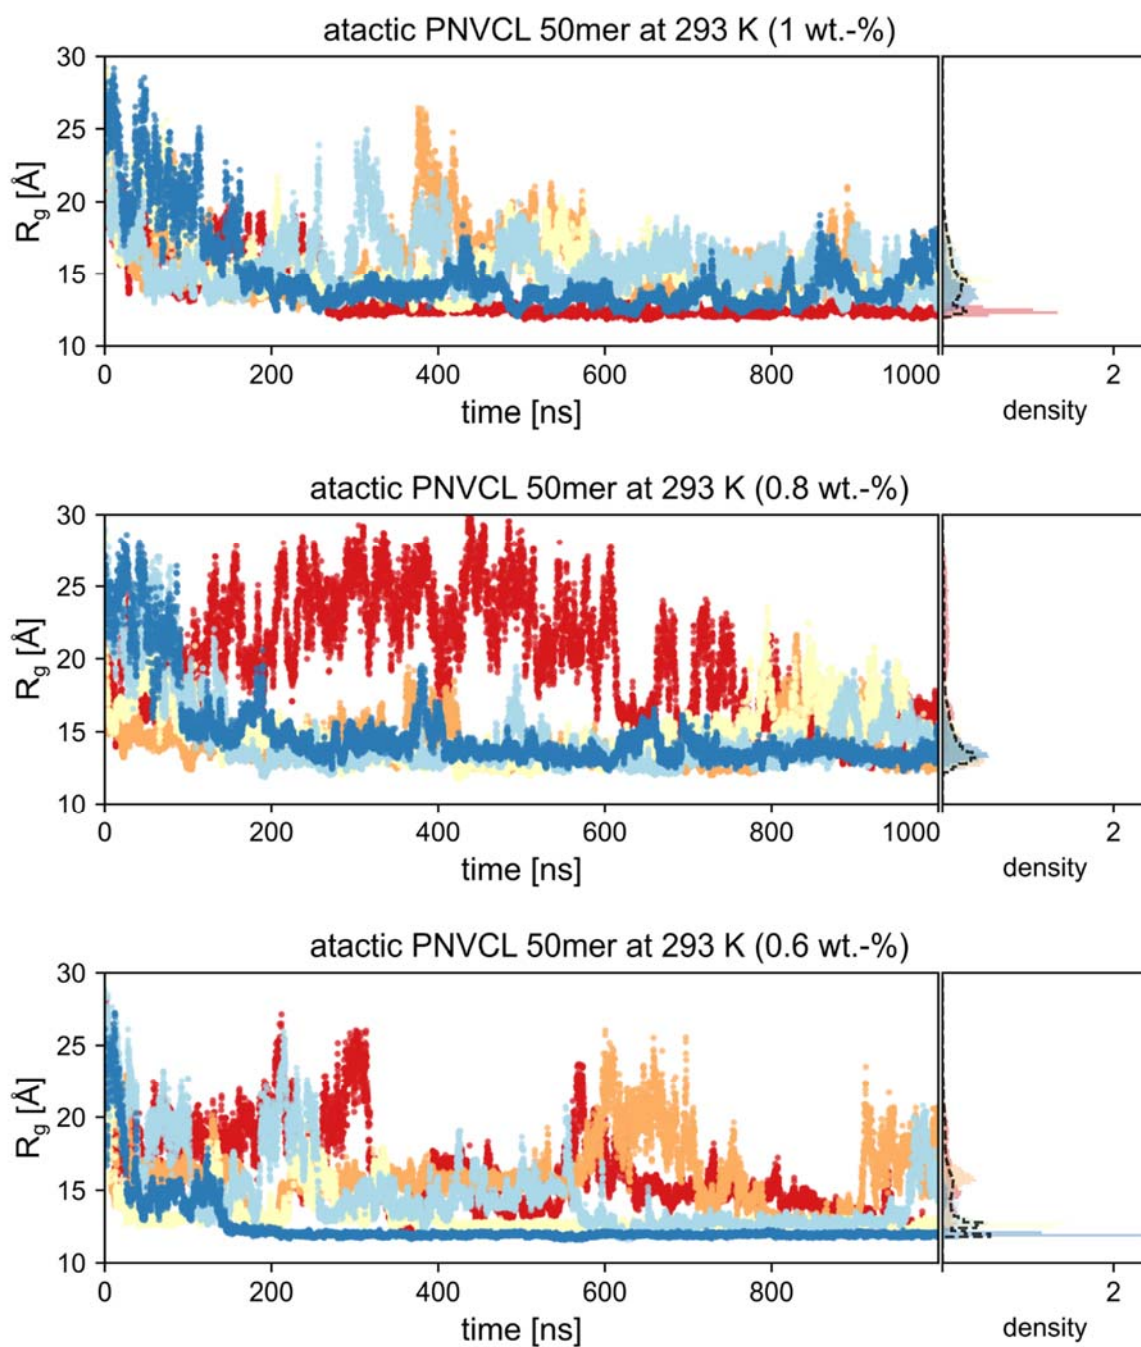

**Figure S21.** Radius of gyration ( $R_g$ ) during five MD simulations of 1  $\mu$ s length of an atactic PNVL 50mer at 293 K for polymer concentrations of 1 wt.-%, 0.8 wt.-%, and 0.6 wt.-% (top to bottom). Corresponding frequency distributions are shown next to the time series in matching color, a frequency distribution of all data is shown as dashed black line.



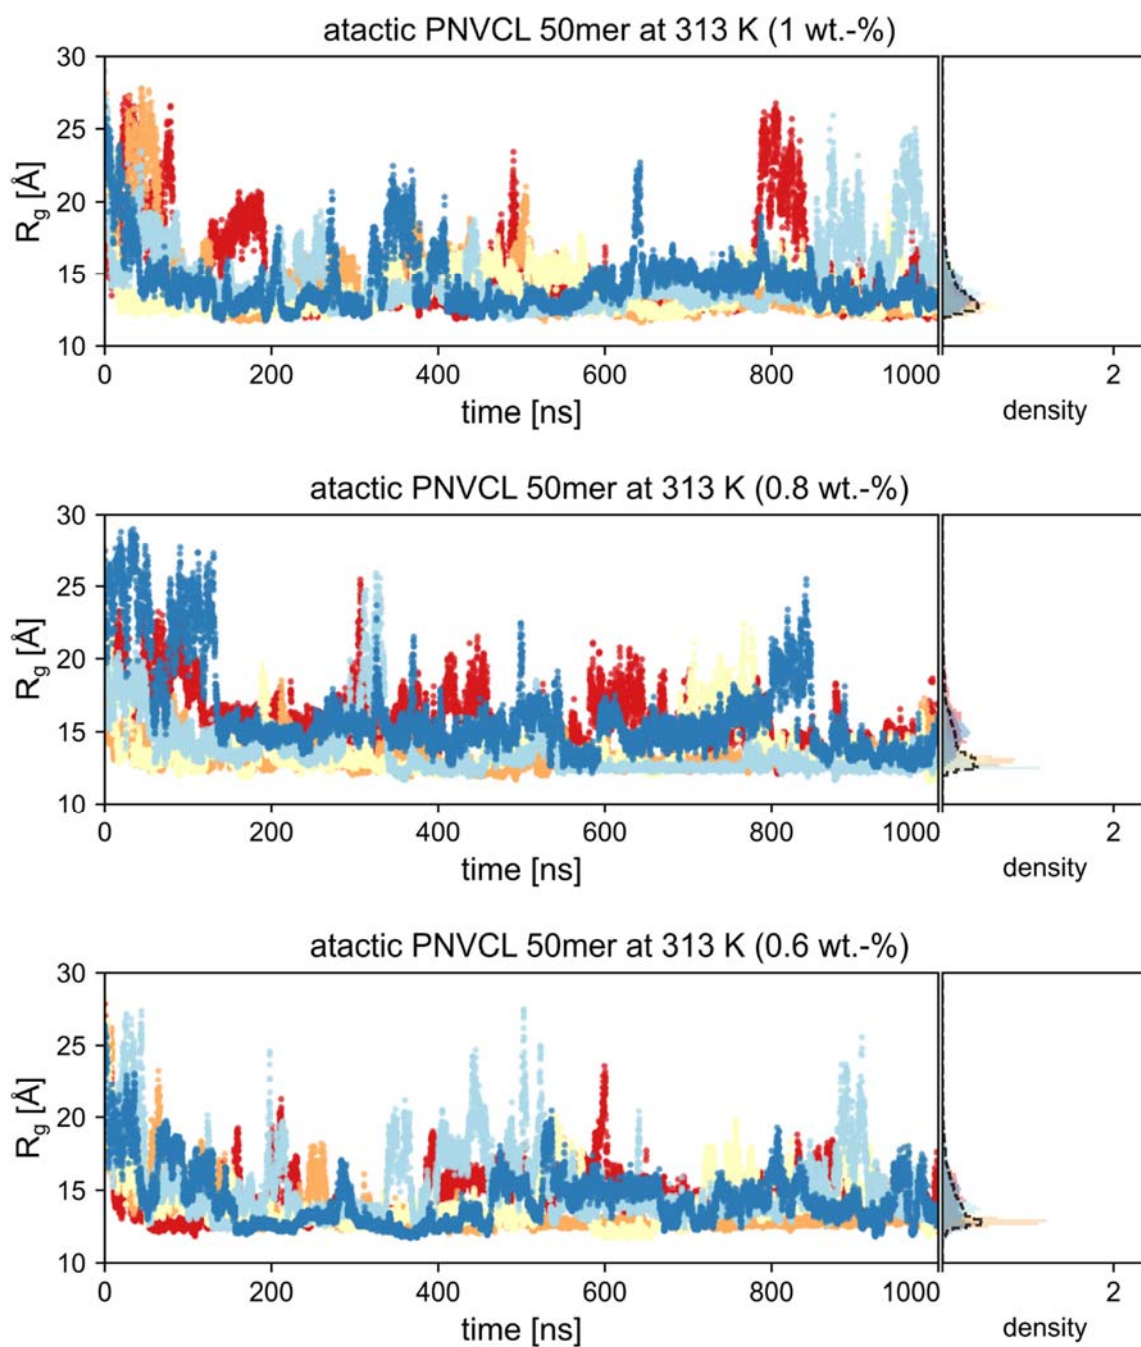

**Figure S22.** Radius of gyration ( $R_g$ ) during five MD simulations of 1  $\mu\text{s}$  length of an atactic PNVL 50mer at 313 K for polymer concentrations of 1 wt.-%, 0.8 wt.-%, and 0.6 wt.-% (top to bottom). Corresponding frequency distributions are shown next to the time series in matching color, a frequency distribution of all data is shown as dashed black line.

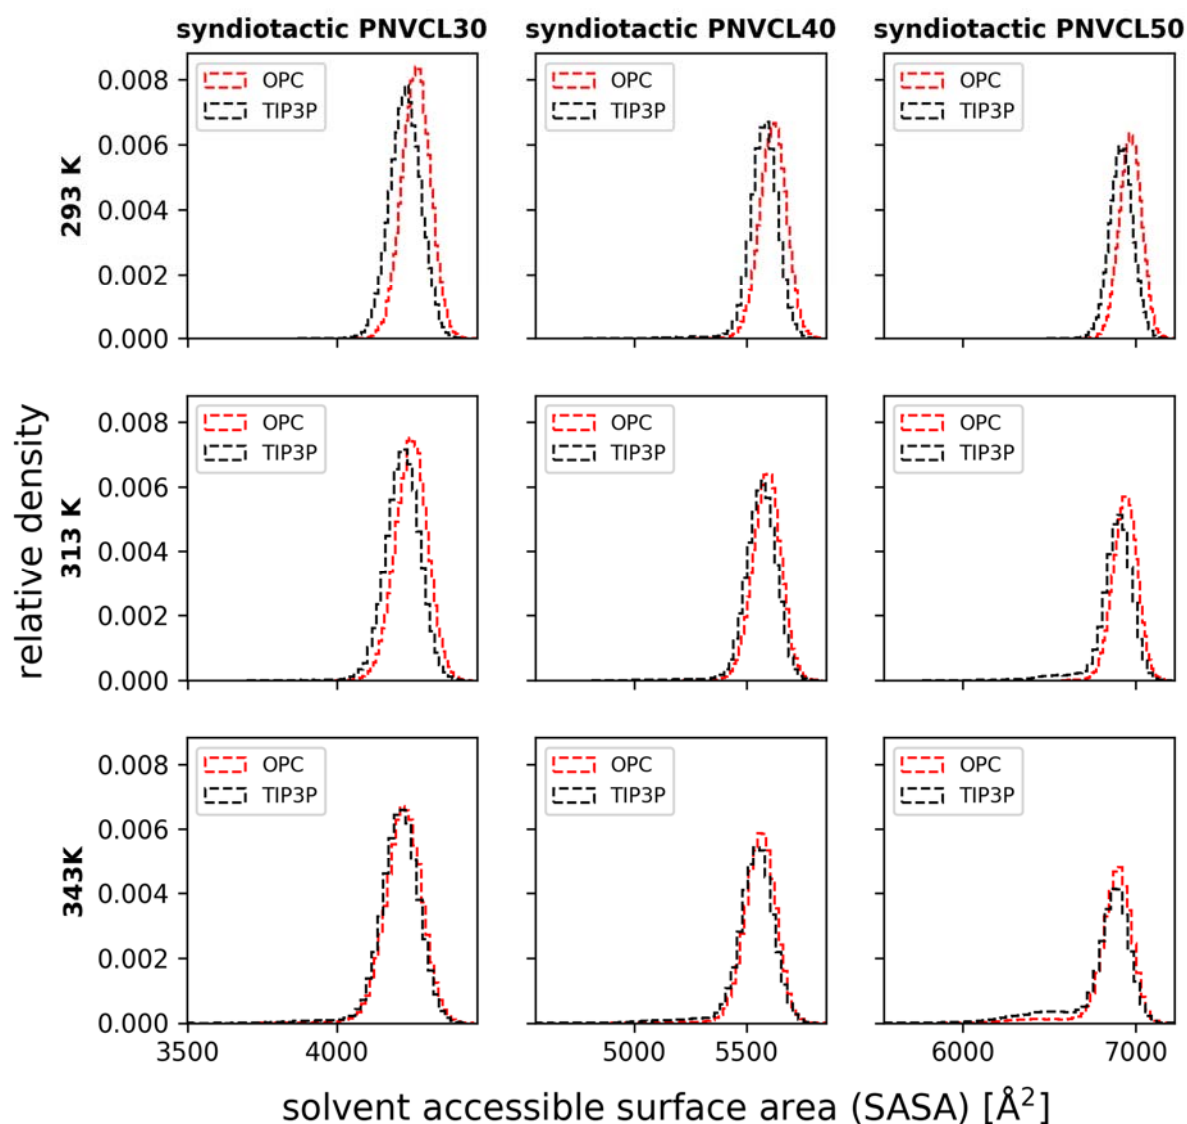

**Figure S23.** Influence of different water models on the solvent-accessible surface area (SASA) of syndiotactic PNVCL oligomers. The histograms depict the SASA observed in five independent 1  $\mu\text{s}$  MD simulations for systems of PNVCL oligomers of varying length (30, 40, and 50 repeating units, from left to right) at different temperatures (293 K, 313K, and 343 K, from top to bottom) using the TIP3P water model (black) or the OPC water model (red).

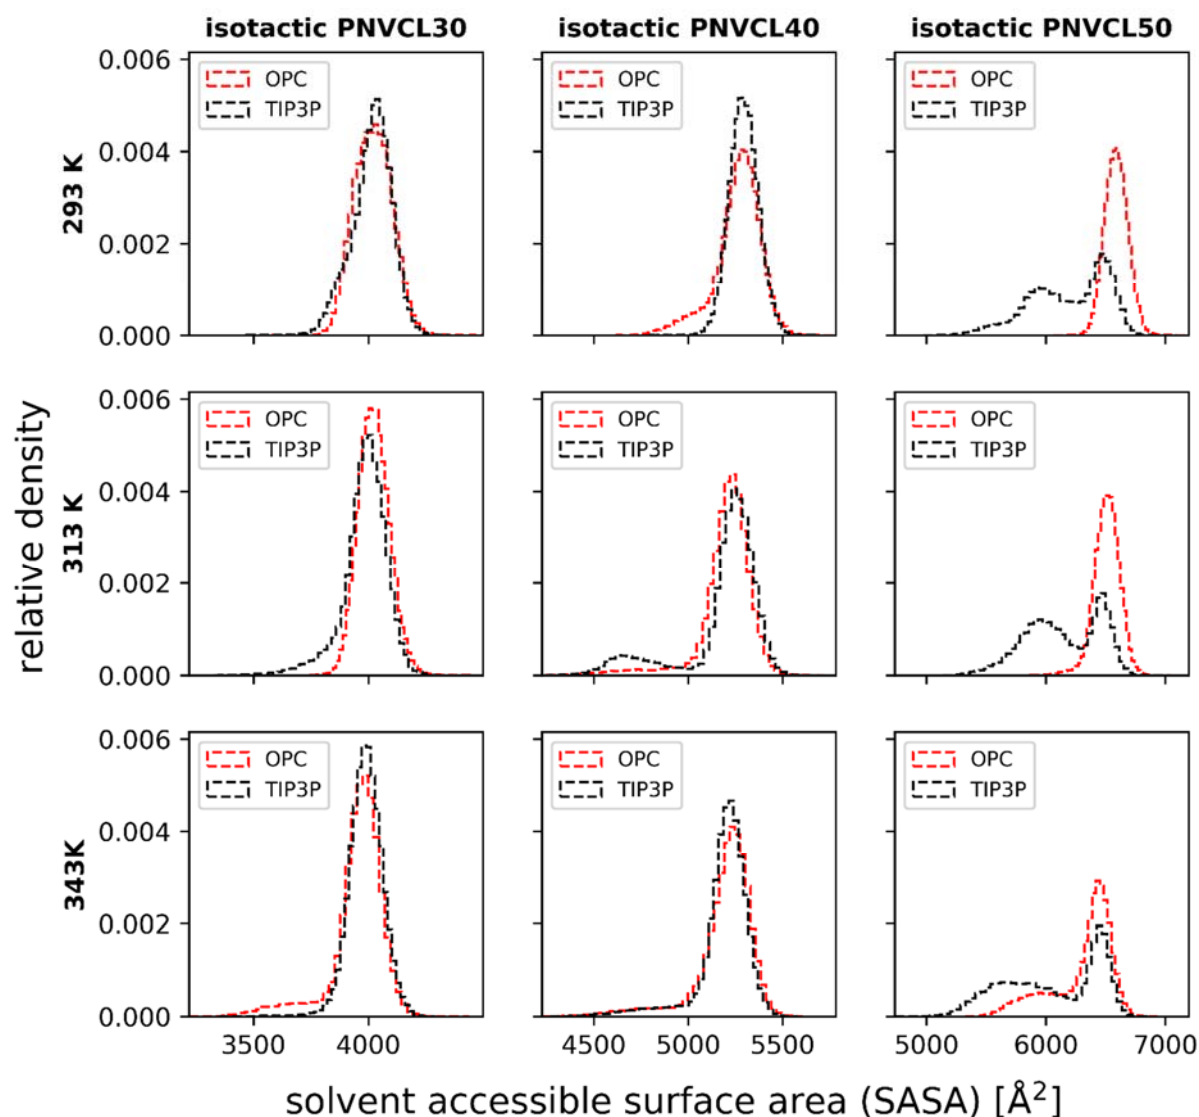

**Figure S24.** Influence of different water models on the solvent-accessible surface area (SASA) of isotactic PNVCL oligomers. The histograms depict the SASA observed in five independent 1  $\mu$ s MD simulations for systems of PNVCL oligomers of varying length (30, 40, and 50 repeating units, from left to right) at different temperatures (293 K, 313K, and 343 K, from top to bottom) using the TIP3P water model (black) or the OPC water model (red).

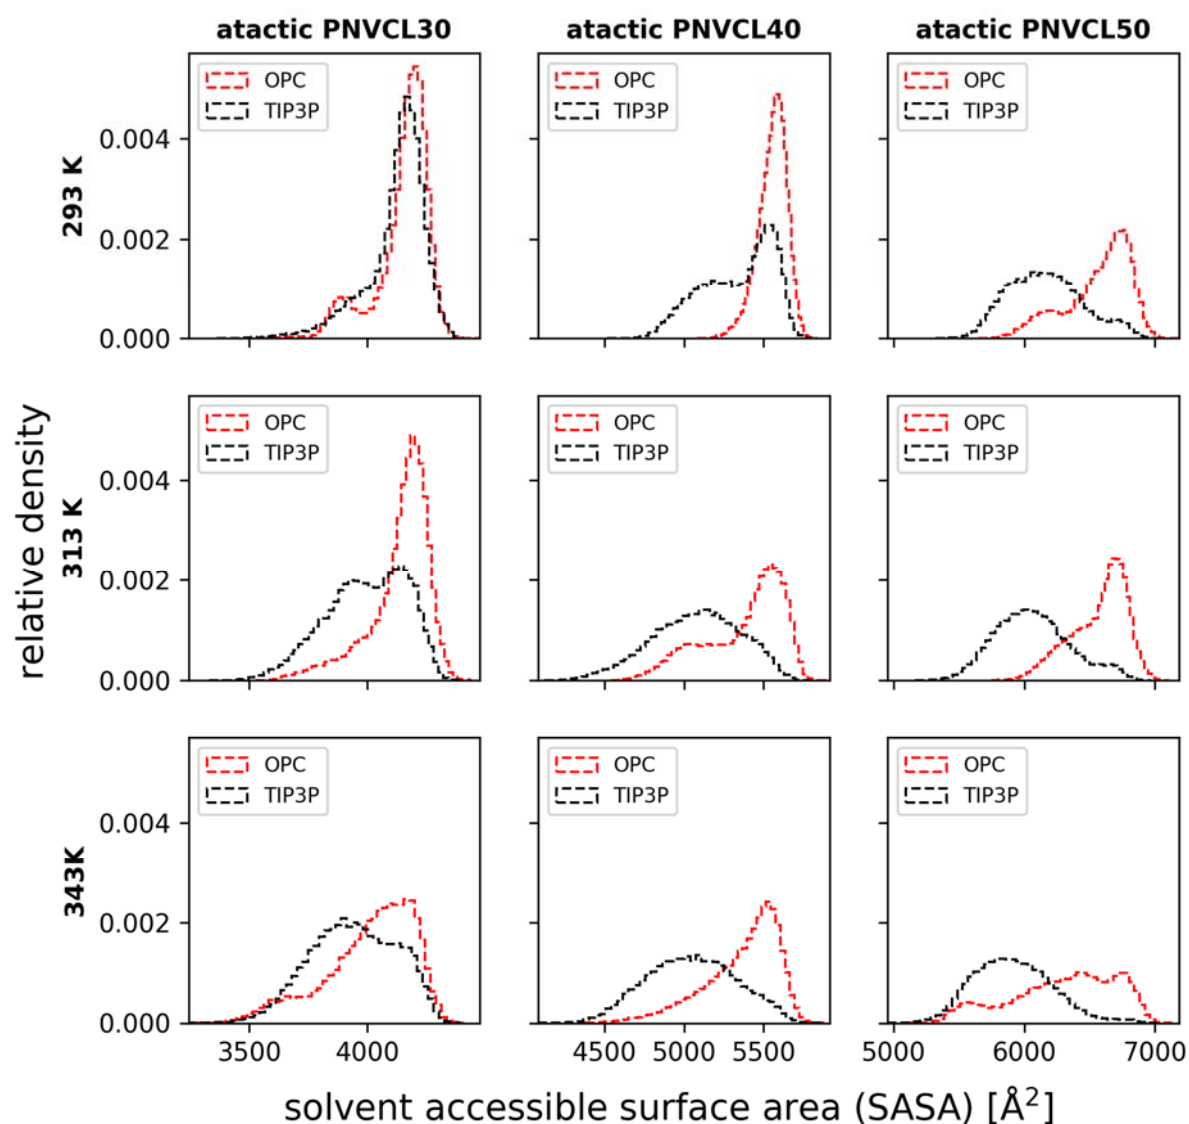

**Figure S25.** Influence of different water models on the solvent-accessible surface area (SASA) of atactic PNVCL oligomers. The histograms depict the SASA observed in five independent 1  $\mu$ s MD simulations for systems of PNVCL oligomers of varying length (30, 40, and 50 repeating units, from left to right) at different temperatures (293 K, 313K, and 343 K, from top to bottom) using the TIP3P water model (black) or the OPC water model (red).

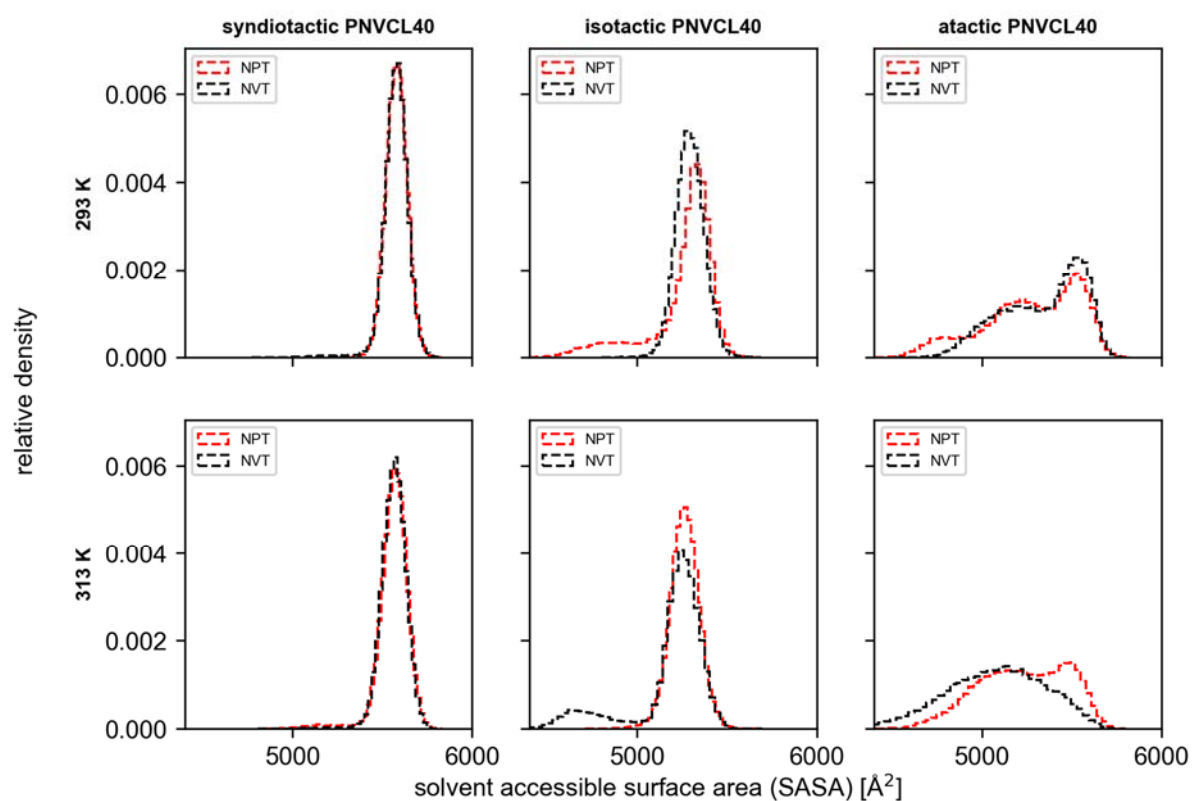

**Figure S26.** Influence of the MD ensemble (NVT / NPT) on the solvent-accessible surface area (SASA) of the iso-, syndio-, and atactic PNVL 40mer. The histograms depict the SASA observed in five independent 1  $\mu$ s MD simulations for each tacticity of PNVL (from left to right) at different temperatures (293 K and 313K, from top to bottom) using the NVT (black) or NPT (red) ensemble.

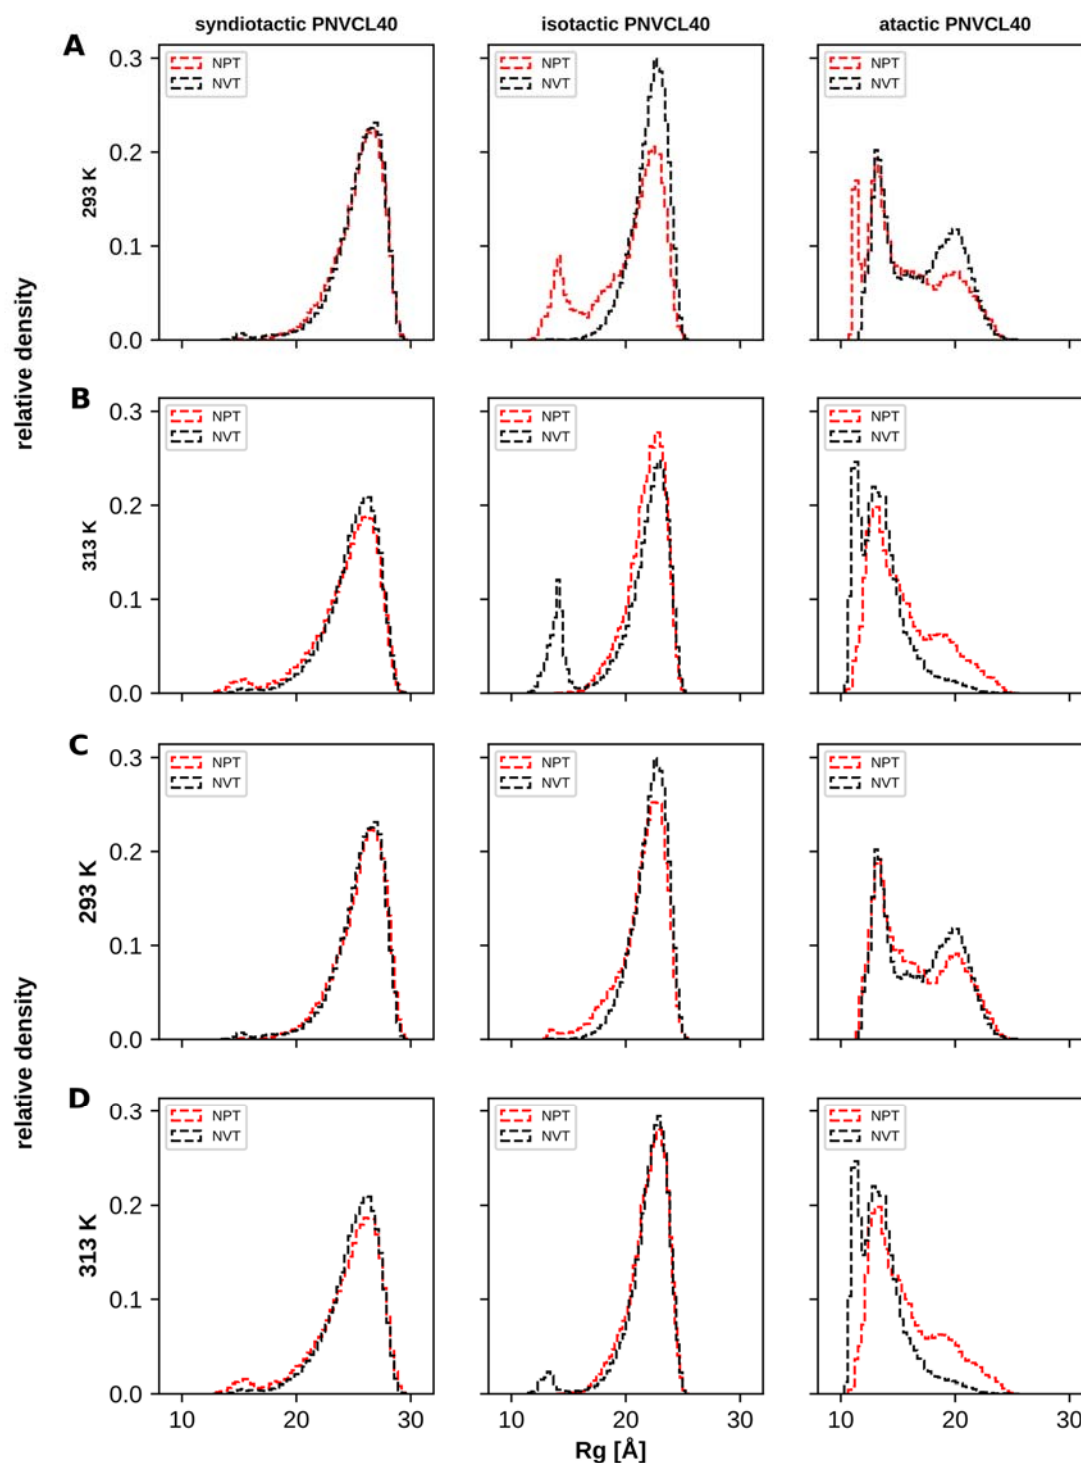

**Figure S27.** Influence of the MD ensemble (NVT / NPT) on the radius of gyration ( $R_g$ ) of the iso-, syndio-, and atactic PNVL 40mer. (A, B) The histograms depict the  $R_g$  observed in five independent 1  $\mu$ s MD simulations for each tacticity of PNVL (from left to right) at different temperatures (293 K (A) and 313 K (B), from top to bottom) using the NVT (black) or NPT (red) ensemble. (C, D) Histograms are obtained by removing one deviating trajectory from the five trajectories of the three systems showing notable deviations in panel A and B, respectively (atactic PNVL (293 K, NPT), isotactic PNVL (293 K, NPT), isotactic PNVL (313 K, NVT)).

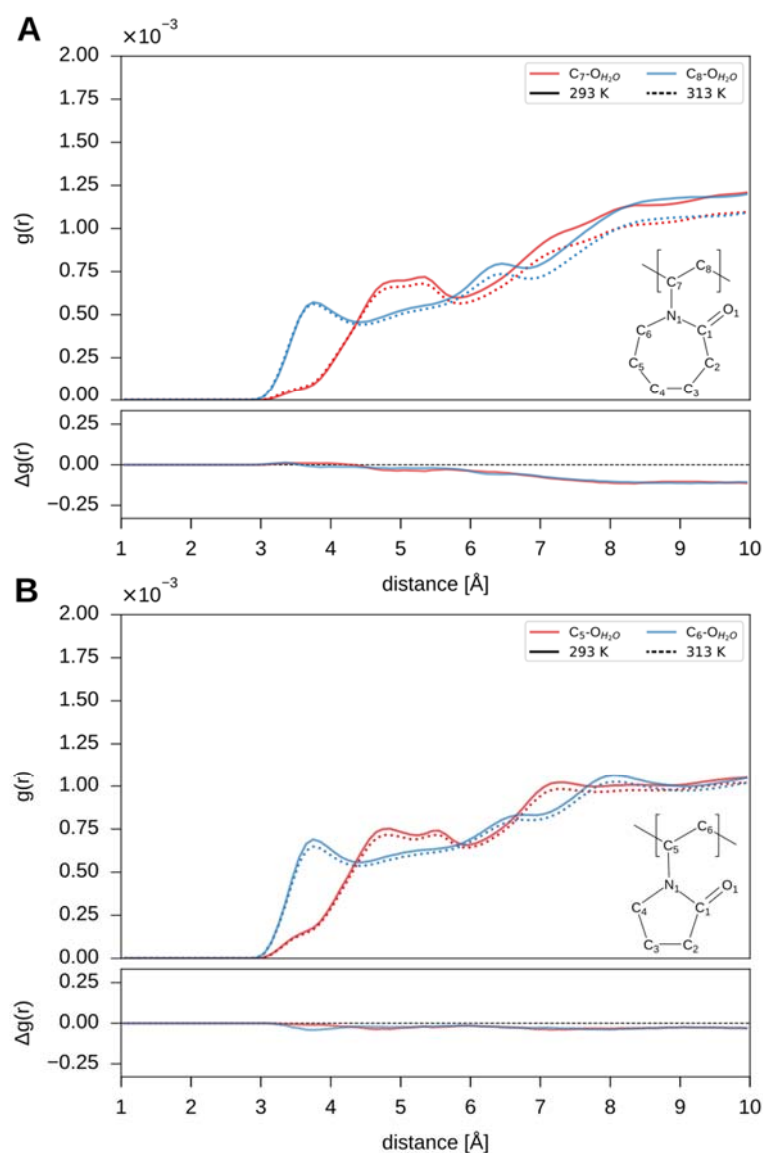

**Figure S28.** Radial distribution functions (RDFs) for the polymer backbone carbons atoms of PNVCL (A) and PVP (B) and the oxygen of the surrounding water molecules. Atom pairings are depicted in respective colors, and RDFs calculated from trajectories at 293 K, and 313 K are shown as solid and dotted lines, respectively. Differences in the RDFs,  $\Delta g(r) = g(r)_{313} - g(r)_{293}$ , are depicted in the plots below. Calculations were performed using CPPTRAJ<sup>5</sup>.

## Supplementary Tables

**Table S1.** Overview of performed simulations on poly(*N*-vinylcaprolactam) (PNVCL).

| System     |                    |              |                                   | Temperature<br>[a] | Length <sup>[b]</sup> | Replicas | Total<br>[b] |
|------------|--------------------|--------------|-----------------------------------|--------------------|-----------------------|----------|--------------|
| Polymer    | Repeating<br>units | Tacticity    | MD<br>ensemble/<br>water<br>model |                    |                       |          |              |
| NVT        |                    |              |                                   |                    |                       |          |              |
| PNVCL      | 5                  | isotactic    | TIP3P                             | 293, 313, 343      | 1                     | 5        | 15           |
| PNVCL      | 5                  | syndiotactic | TIP3P                             | 293, 313, 343      | 1                     | 5        | 15           |
| PNVCL      | 5                  | atactic      | TIP3P                             | 293, 313, 343      | 1                     | 5        | 15           |
| PNVCL      | 10                 | isotactic    | TIP3P                             | 293, 313, 343      | 1                     | 5        | 15           |
| PNVCL      | 10                 | syndiotactic | TIP3P                             | 293, 313, 343      | 1                     | 5        | 15           |
| PNVCL      | 10                 | atactic      | TIP3P                             | 293, 313, 343      | 1                     | 5        | 15           |
| PNVCL      | 15                 | isotactic    | TIP3P                             | 293, 313, 343      | 1                     | 5        | 15           |
| PNVCL      | 15                 | syndiotactic | TIP3P                             | 293, 313, 343      | 1                     | 5        | 15           |
| PNVCL      | 15                 | atactic      | TIP3P                             | 293, 313, 343      | 1                     | 5        | 15           |
| PNVCL      | 20                 | isotactic    | TIP3P                             | 293, 313, 343      | 1                     | 5        | 15           |
| PNVCL      | 20                 | syndiotactic | TIP3P                             | 293, 313, 343      | 1                     | 5        | 15           |
| PNVCL      | 20                 | atactic      | TIP3P                             | 293, 313, 343      | 1                     | 5        | 15           |
| PNVCL      | 25                 | isotactic    | TIP3P                             | 293, 313, 343      | 1                     | 5        | 15           |
| PNVCL      | 25                 | syndiotactic | TIP3P                             | 293, 313, 343      | 1                     | 5        | 15           |
| PNVCL      | 25                 | atactic      | TIP3P                             | 293, 313, 343      | 1                     | 5        | 15           |
| PNVCL      | 30                 | isotactic    | TIP3P                             | 293, 313, 343      | 1                     | 5        | 15           |
| PNVCL      | 30                 | syndiotactic | TIP3P                             | 293, 313, 343      | 1                     | 5        | 15           |
| PNVCL      | 30                 | atactic      | TIP3P                             | 293, 313, 343      | 1                     | 5        | 15           |
| PNVCL      | 40                 | isotactic    | TIP3P                             | 293, 313, 343      | 1                     | 5        | 15           |
| PNVCL      | 40                 | syndiotactic | TIP3P                             | 293, 313, 343      | 1                     | 5        | 15           |
| PNVCL      | 40                 | atactic      | TIP3P                             | 293, 313, 343      | 1                     | 5        | 15           |
| PNVCL      | 50                 | isotactic    | TIP3P                             | 293, 313, 343      | 1                     | 5        | 15           |
| PNVCL      | 50                 | syndiotactic | TIP3P                             | 293, 313, 343      | 1                     | 5        | 15           |
| PNVCL      | 50                 | atactic      | TIP3P                             | 293, 313, 343      | 1                     | 5        | 15           |
| <b>Sum</b> |                    |              |                                   |                    |                       |          | <b>360</b>   |
| NPT        |                    |              |                                   |                    |                       |          |              |
| PNVCL      | 40                 | isotactic    | TIP3P                             | 293, 313           | 1                     | 5        | 10           |
| PNVCL      | 40                 | syndiotactic | TIP3P                             | 293, 313           | 1                     | 5        | 10           |
| PNVCL      | 40                 | atactic      | TIP3P                             | 293, 313           | 1                     | 5        | 10           |
| <b>Sum</b> |                    |              |                                   |                    |                       |          | <b>30</b>    |
| NVT        |                    |              |                                   |                    |                       |          |              |
| PNVCL      | 30                 | isotactic    | OPC                               | 293, 313, 343      | 1                     | 5        | 15           |
| PNVCL      | 30                 | syndiotactic | OPC                               | 293, 313, 343      | 1                     | 5        | 15           |
| PNVCL      | 30                 | atactic      | OPC                               | 293, 313, 343      | 1                     | 5        | 15           |
| PNVCL      | 40                 | isotactic    | OPC                               | 293, 313, 343      | 1                     | 5        | 15           |
| PNVCL      | 40                 | syndiotactic | OPC                               | 293, 313, 343      | 1                     | 5        | 15           |
| PNVCL      | 40                 | atactic      | OPC                               | 293, 313, 343      | 1                     | 5        | 15           |
| PNVCL      | 50                 | isotactic    | OPC                               | 293, 313, 343      | 1                     | 5        | 15           |
| PNVCL      | 50                 | syndiotactic | OPC                               | 293, 313, 343      | 1                     | 5        | 15           |
| PNVCL      | 50                 | atactic      | OPC                               | 293, 313, 343      | 1                     | 5        | 15           |
| <b>Sum</b> |                    |              |                                   |                    |                       |          | <b>135</b>   |



**Table S1 continued**

|                                   |    |              | TIP3P     |          |   |   |            |
|-----------------------------------|----|--------------|-----------|----------|---|---|------------|
| PNVCL                             | 50 | isotactic    | 0.6 wt.-% | 293, 313 | 1 | 5 | 10         |
| PNVCL                             | 50 | syndiotactic | 0.6 wt.-% | 293, 313 | 1 | 5 | 10         |
| PNVCL                             | 50 | atactic      | 0.6 wt.-% | 293, 313 | 1 | 5 | 10         |
| PNVCL                             | 50 | isotactic    | 0.8 wt.-% | 293, 313 | 1 | 5 | 10         |
| PNVCL                             | 50 | syndiotactic | 0.8 wt.-% | 293, 313 | 1 | 5 | 10         |
| PNVCL                             | 50 | atactic      | 0.8 wt.-% | 293, 313 | 1 | 5 | 10         |
| <b>Sum</b>                        |    |              |           |          |   |   | <b>60</b>  |
| <b>Cumulative simulation time</b> |    |              |           |          |   |   | <b>585</b> |

<sup>[a]</sup> In [K].<sup>[b]</sup> In [ $\mu$ s].**Table S2.** Overview of performed simulations on poly(*N*-vinylpyrrolidone) (PVP):

| System                            |                 |              |                             |                            |                       |          |                      |
|-----------------------------------|-----------------|--------------|-----------------------------|----------------------------|-----------------------|----------|----------------------|
| Polymer                           | Repeating units | Tacticity    | MD ensemble/<br>water model | Temperature <sup>[a]</sup> | Length <sup>[b]</sup> | Replicas | Total <sup>[b]</sup> |
|                                   |                 |              | NVT                         |                            |                       |          |                      |
| PVP                               | 30              | isotactic    | TIP3P                       | 293, 313                   | 0.5                   | 5        | 5                    |
| PVP                               | 30              | syndiotactic | TIP3P                       | 293, 313                   | 0.5                   | 5        | 5                    |
| PVP                               | 30              | atactic      | TIP3P                       | 293, 313                   | 0.5                   | 5·3      | 15                   |
| PVP                               | 40              | isotactic    | TIP3P                       | 293, 313                   | 0.5                   | 5        | 5                    |
| PVP                               | 40              | syndiotactic | TIP3P                       | 293, 313                   | 0.5                   | 5        | 5                    |
| PVP                               | 40              | atactic      | TIP3P                       | 293, 313                   | 0.5                   | 5·3      | 15                   |
| PVP                               | 50              | isotactic    | TIP3P                       | 293, 313                   | 0.5                   | 5        | 5                    |
| PVP                               | 50              | syndiotactic | TIP3P                       | 293, 313                   | 0.5                   | 5        | 5                    |
| PVP                               | 50              | atactic      | TIP3P                       | 293, 313                   | 0.5                   | 5·3      | 15                   |
| <b>Cumulative simulation time</b> |                 |              |                             |                            |                       |          | <b>75</b>            |

<sup>[a]</sup> In K.<sup>[b]</sup> In  $\mu$ s.

**Table S3.** Number of atoms within each investigated system. Polymer (PNVCL/PVP) and simulation conditions (NVT/NPT and TIP3P/OPC) are provided for each section, number of repeating units and tacticity are given per row.

| System                       |              | Number of atoms |
|------------------------------|--------------|-----------------|
| PNVCL, NVT, TIP3P            |              |                 |
| Repeating units              | Tacticity    |                 |
| 5                            | isotactic    | 5073            |
| 5                            | atactic      | 4902            |
| 5                            | syndiotactic | 4692            |
| 10                           | isotactic    | 10165           |
| 10                           | atactic      | 9400            |
| 10                           | syndiotactic | 9559            |
| 15                           | isotactic    | 17369           |
| 15                           | atactic      | 16478           |
| 15                           | syndiotactic | 17153           |
| 20                           | isotactic    | 26211           |
| 20                           | atactic      | 24459           |
| 20                           | syndiotactic | 25215           |
| 25                           | isotactic    | 35779           |
| 25                           | atactic      | 33151           |
| 25                           | syndiotactic | 33355           |
| 30                           | isotactic    | 46514           |
| 30                           | atactic      | 45164           |
| 30                           | syndiotactic | 44609           |
| 40                           | isotactic    | 79159           |
| 40                           | atactic      | 78532           |
| 40                           | syndiotactic | 77368           |
| 50                           | isotactic    | 123504          |
| 50                           | atactic      | 122310          |
| 50                           | syndiotactic | 123150          |
| PNVCL, NVT, OPC              |              |                 |
| 30                           | isotactic    | 61662           |
| 30                           | atactic      | 60254           |
| 30                           | syndiotactic | 59478           |
| 40                           | isotactic    | 105548          |
| 40                           | atactic      | 104752          |
| 40                           | syndiotactic | 103232          |
| 50                           | isotactic    | 164098          |
| 50                           | atactic      | 163098          |
| 50                           | syndiotactic | 163670          |
| PNVCL, NPT, TIP3P            |              |                 |
| 40                           | isotactic    | 79159           |
| 40                           | atactic      | 78532           |
| 40                           | syndiotactic | 77368           |
| PNVCL, NVT, TIP3P, 0.8 wt.-% |              |                 |
| 50                           | isotactic    | 169311          |
| 50                           | atactic      | 167559          |
| 50                           | syndiotactic | 168747          |
| PNVCL, NVT, TIP3P, 0.6 wt.-% |              |                 |
| 50                           | isotactic    | 227754          |
| 50                           | atactic      | 225354          |
| 50                           | syndiotactic | 227061          |

Table S3 continued

| System          |              | Number of atoms |
|-----------------|--------------|-----------------|
| PVP, NVT, TIP3P |              |                 |
| Repeating units | Tacticity    |                 |
| 30              | isotactic    | 53798           |
| 30              | atactic      | 53804           |
| 30              | atactic      | 51803           |
| 30              | atactic      | 51782           |
| 30              | syndiotactic | 53696           |
| 40              | isotactic    | 97348           |
| 40              | atactic      | 97372           |
| 40              | atactic      | 95350           |
| 40              | atactic      | 97447           |
| 40              | syndiotactic | 97279           |
| 50              | isotactic    | 154881          |
| 50              | atactic      | 153132          |
| 50              | atactic      | 152988          |
| 50              | atactic      | 153057          |
| 50              | syndiotactic | 155220          |

**Table S4.** Residues containing carbon atoms with inverted chirality for atactic structures of PNVCL and PVP.

|                                             | Position in the chain |   |   |   |   |   |   |   |   |   |   |   |   |   |   |   |   |   |   |   |   |   |   |   |   |   |   |   |   |   |   |   |   |   |   |   |   |   |   |   |  |  |  |  |   |  |  |  |  |   |  |  |  |  |  |
|---------------------------------------------|-----------------------|---|---|---|---|---|---|---|---|---|---|---|---|---|---|---|---|---|---|---|---|---|---|---|---|---|---|---|---|---|---|---|---|---|---|---|---|---|---|---|--|--|--|--|---|--|--|--|--|---|--|--|--|--|--|
|                                             |                       |   |   |   | 5 |   |   |   |   | 1 |   |   |   |   | 1 |   |   |   |   | 2 |   |   |   |   | 2 |   |   |   |   | 3 |   |   |   |   | 3 |   |   |   |   | 4 |  |  |  |  | 4 |  |  |  |  | 5 |  |  |  |  |  |
|                                             |                       |   |   |   | 0 |   |   |   |   | 0 |   |   |   |   | 5 |   |   |   |   | 0 |   |   |   |   | 5 |   |   |   |   | 0 |   |   |   |   | 5 |   |   |   |   | 0 |  |  |  |  | 5 |  |  |  |  | 0 |  |  |  |  |  |
| PNVCL, NVT, TIP3P                           |                       |   |   |   |   |   |   |   |   |   |   |   |   |   |   |   |   |   |   |   |   |   |   |   |   |   |   |   |   |   |   |   |   |   |   |   |   |   |   |   |  |  |  |  |   |  |  |  |  |   |  |  |  |  |  |
| 5mer                                        |                       |   |   |   | x |   |   |   |   |   |   |   |   |   |   |   |   |   |   |   |   |   |   |   |   |   |   |   |   |   |   |   |   |   |   |   |   |   |   |   |  |  |  |  |   |  |  |  |  |   |  |  |  |  |  |
| 10mer                                       | x                     | x |   | x | x |   | x | x | x | x |   |   |   |   |   |   |   |   |   |   |   |   |   |   |   |   |   |   |   |   |   |   |   |   |   |   |   |   |   |   |  |  |  |  |   |  |  |  |  |   |  |  |  |  |  |
| 15mer                                       | x                     |   | x | x |   |   | x | x | x |   | x | x | x |   | x |   |   |   |   |   |   |   |   |   |   |   |   |   |   |   |   |   |   |   |   |   |   |   |   |   |  |  |  |  |   |  |  |  |  |   |  |  |  |  |  |
| 20mer                                       |                       | x |   | x |   |   |   | x |   |   |   | x | x |   | x | x |   | x | x |   |   |   |   |   |   |   |   |   |   |   |   |   |   |   |   |   |   |   |   |   |  |  |  |  |   |  |  |  |  |   |  |  |  |  |  |
| 25mer                                       | x                     | x |   | x |   |   | x |   | x |   |   | x |   | x | x | x | x | x |   |   |   | x | x |   | x |   |   |   |   |   |   |   |   |   |   |   |   |   |   |   |  |  |  |  |   |  |  |  |  |   |  |  |  |  |  |
| 30mer                                       |                       | x |   |   |   |   | x |   | x | x |   |   | x |   | x | x | x | x | x |   |   | x | x |   | x | x | x | x | x |   |   |   |   |   |   |   |   |   |   |   |  |  |  |  |   |  |  |  |  |   |  |  |  |  |  |
| 40mer                                       |                       |   |   |   |   |   | x |   | x |   |   | x | x | x | x |   |   |   |   |   | x | x | x |   | x | x | x |   | x |   |   | x | x |   |   |   |   |   |   |   |  |  |  |  |   |  |  |  |  |   |  |  |  |  |  |
| 50mer                                       |                       |   |   |   |   |   |   |   | x |   |   |   | x | x |   | x | x |   |   |   | x |   | x |   |   |   | x | x | x |   |   | x |   |   |   |   |   |   |   |   |  |  |  |  |   |  |  |  |  |   |  |  |  |  |  |
| PNVCL, NPT, TIP3P                           |                       |   |   |   |   |   |   |   |   |   |   |   |   |   |   |   |   |   |   |   |   |   |   |   |   |   |   |   |   |   |   |   |   |   |   |   |   |   |   |   |  |  |  |  |   |  |  |  |  |   |  |  |  |  |  |
| 40mer                                       |                       |   |   |   |   |   |   | x |   | x |   |   | x | x | x |   |   |   | x | x | x |   | x | x | x |   | x | x |   | x | x |   |   | x | x |   |   |   |   |   |  |  |  |  |   |  |  |  |  |   |  |  |  |  |  |
| PNVCL, NVT, OPC                             |                       |   |   |   |   |   |   |   |   |   |   |   |   |   |   |   |   |   |   |   |   |   |   |   |   |   |   |   |   |   |   |   |   |   |   |   |   |   |   |   |  |  |  |  |   |  |  |  |  |   |  |  |  |  |  |
| 30mer                                       |                       | x |   |   |   |   | x |   | x | x |   |   | x |   | x | x | x | x | x |   |   | x | x |   | x | x | x | x | x |   |   |   |   |   |   |   |   |   |   |   |  |  |  |  |   |  |  |  |  |   |  |  |  |  |  |
| 40mer                                       |                       |   |   |   |   |   | x |   | x |   |   | x | x | x | x |   |   |   |   |   | x | x | x |   | x | x | x |   | x |   |   | x | x |   |   |   |   |   |   |   |  |  |  |  |   |  |  |  |  |   |  |  |  |  |  |
| 50mer                                       |                       |   |   |   |   |   |   |   | x |   |   |   | x | x |   | x | x |   |   |   |   | x |   | x |   |   | x | x | x |   |   | x |   |   |   |   |   |   |   |   |  |  |  |  |   |  |  |  |  |   |  |  |  |  |  |
| PNVCL, NVT, TIP3P, different concentrations |                       |   |   |   |   |   |   |   |   |   |   |   |   |   |   |   |   |   |   |   |   |   |   |   |   |   |   |   |   |   |   |   |   |   |   |   |   |   |   |   |  |  |  |  |   |  |  |  |  |   |  |  |  |  |  |
| 50mer                                       |                       |   |   |   |   |   |   |   | x |   |   |   | x | x |   | x | x |   |   |   |   | x | x |   |   |   | x | x | x |   |   | x |   |   |   |   |   |   |   |   |  |  |  |  |   |  |  |  |  |   |  |  |  |  |  |
| PVP, NVT, TIP3P                             |                       |   |   |   |   |   |   |   |   |   |   |   |   |   |   |   |   |   |   |   |   |   |   |   |   |   |   |   |   |   |   |   |   |   |   |   |   |   |   |   |  |  |  |  |   |  |  |  |  |   |  |  |  |  |  |
| 30mer                                       |                       |   |   | x | x |   | x | x |   | x | x | x | x | x |   |   |   | x | x |   |   | x |   |   | x | x | x |   |   |   |   |   |   |   |   |   |   |   |   |   |  |  |  |  |   |  |  |  |  |   |  |  |  |  |  |
|                                             | x                     |   | x |   | x | x | x | x |   | x |   |   | x | x |   |   | x |   |   |   | x |   |   | x |   |   | x |   |   |   |   |   |   |   |   |   |   |   |   |   |  |  |  |  |   |  |  |  |  |   |  |  |  |  |  |
|                                             |                       | x | x | x | x | x |   |   | x |   |   | x | x | x | x |   |   |   | x | x |   |   | x | x |   |   |   |   | x |   |   |   |   |   |   |   |   |   |   |   |  |  |  |  |   |  |  |  |  |   |  |  |  |  |  |
| 40mer                                       |                       | x | x |   |   | x |   |   | x |   |   | x | x |   |   | x | x |   |   | x | x |   |   | x | x |   |   | x | x |   |   | x |   |   |   |   |   |   |   |   |  |  |  |  |   |  |  |  |  |   |  |  |  |  |  |
|                                             |                       | x | x |   |   | x | x | x |   | x |   |   |   |   | x |   |   |   | x |   |   |   | x |   |   | x | x |   |   |   |   | x |   |   |   |   |   |   |   |   |  |  |  |  |   |  |  |  |  |   |  |  |  |  |  |
|                                             | x                     | x |   |   | x | x |   | x |   |   |   | x |   |   |   | x |   |   |   | x | x |   |   | x | x | x |   |   | x | x | x | x |   |   | x | x | x | x | x |   |  |  |  |  |   |  |  |  |  |   |  |  |  |  |  |
| 50mer                                       | x                     |   | x |   | x | x | x | x | x | x | x | x |   |   |   | x | x |   |   | x |   |   |   | x |   |   | x |   |   |   |   |   |   |   |   |   |   |   |   |   |  |  |  |  |   |  |  |  |  |   |  |  |  |  |  |
|                                             | x                     | x |   |   |   |   | x |   | x | x |   |   |   |   | x |   |   |   | x |   |   |   | x |   |   |   |   |   |   |   |   |   |   |   |   |   |   |   |   |   |  |  |  |  |   |  |  |  |  |   |  |  |  |  |  |
|                                             | x                     |   | x |   | x |   | x | x | x | x | x |   |   |   |   |   |   |   |   |   |   |   | x |   |   | x | x |   |   |   |   |   |   |   |   |   |   |   |   |   |  |  |  |  |   |  |  |  |  |   |  |  |  |  |  |

**Table S5.** Partial charges and coordinates of the atoms of the PNVCL repeating unit. The repeating unit possesses two open valences/connect records (C9 and C10), its net charge is zero.

| Atom number | Atom name <sup>[a]</sup> | X        | Y         | Z         | Charge <sup>[b]</sup> |
|-------------|--------------------------|----------|-----------|-----------|-----------------------|
| 1           | C10                      | 3.540003 | 1.419779  | 0.000002  | 0.1586                |
| 2           | N1                       | 2.072742 | 1.385823  | -0.113022 | -0.1702               |
| 3           | C1                       | 1.361680 | 2.430967  | 0.394038  | 0.4927                |
| 4           | C2                       | 0.147772 | 2.431003  | 0.206963  | -0.1076               |
| 5           | C3                       | 0.882646 | 1.277252  | 0.907811  | 0.0136                |
| 6           | C4                       | 0.873659 | -0.037083 | 0.126603  | -0.1299               |
| 7           | C5                       | 0.516471 | -0.608169 | -0.149407 | 0.0697                |
| 8           | C6                       | 1.454795 | 0.332093  | -0.912610 | -0.1441               |
| 9           | H9                       | 2.259787 | -0.257933 | -1.322608 | 0.0656                |
| 10          | H10                      | 0.934927 | 0.757022  | -1.767444 | 0.0656                |
| 11          | H7                       | 0.993614 | -0.902292 | 0.781933  | 0.0050                |
| 12          | H8                       | 0.402425 | -1.514410 | -0.740563 | 0.0050                |
| 13          | H5                       | 1.458537 | -0.775905 | 0.666469  | 0.0292                |
| 14          | H6                       | 1.383829 | 0.119987  | -0.823742 | 0.0292                |
| 15          | H4                       | 1.913757 | 1.579298  | 1.058816  | 0.0210                |
| 16          | H3                       | 0.460752 | 1.129275  | 1.898607  | 0.0210                |
| 17          | H1                       | 0.473614 | 3.375599  | 0.616797  | 0.0418                |
| 18          | H2                       | 0.392762 | 2.437013  | -0.853078 | 0.0418                |
| 19          | O1                       | 1.880690 | 3.339947  | 0.991038  | -0.6639               |
| 20          | H19                      | 3.751995 | 2.301651  | 0.578912  | 0.0885                |
| 21          | C9                       | 4.098076 | 0.210499  | 0.763167  | 0.0483                |
| 22          | H17                      | 5.182318 | 0.252471  | 0.698154  | 0.0096                |
| 23          | H18                      | 3.806962 | -0.716729 | 0.274041  | 0.0096                |

<sup>[a]</sup> See Figure S6 for the structure.<sup>[b]</sup> In e.**Table S6.** Partial charges and coordinates of the atoms of the PVP repeating unit. The repeating unit possesses two open valences/connect records (C4 and C5); its net charge is zero.

| Atom number | Atom name | X         | Y         | Z         | Charge <sup>[a]</sup> |
|-------------|-----------|-----------|-----------|-----------|-----------------------|
| 1           | C4        | 3.540003  | 1.419779  | 0.000002  | 0.1324                |
| 2           | N1        | 2.147718  | 1.340814  | -0.422081 | -0.1473               |
| 3           | C2        | 1.262838  | 0.488983  | 0.154826  | 0.5274                |
| 4           | C1        | -0.049847 | 0.596013  | -0.599976 | -0.2009               |
| 5           | C8        | 0.093183  | 1.888002  | -1.406950 | -0.0742               |
| 6           | C3        | 1.612482  | 2.031987  | -1.581003 | -0.0750               |
| 7           | H3        | 1.951550  | 1.570864  | -2.506283 | 0.0560                |
| 8           | H4        | 1.926608  | 3.068291  | -1.597996 | 0.0560                |
| 9           | H14       | -0.428687 | 1.867039  | -2.355686 | 0.0455                |
| 10          | H15       | -0.287779 | 2.726984  | -0.83595  | 0.0455                |
| 11          | H1        | -0.884155 | 0.583035  | 0.08728   | 0.0767                |
| 12          | H2        | -0.135916 | -0.278231 | -1.24017  | 0.0767                |
| 13          | O1        | 1.481789  | -0.232962 | 1.08673   | -0.6768               |
| 14          | H5        | 3.613974  | 0.735868  | 0.83388   | 0.0888                |
| 15          | C5        | 4.507986  | 0.953756  | -1.09498  | 0.0573                |
| 16          | H6        | 5.518135  | 1.052730  | -0.70591  | 0.0059                |
| 17          | H7        | 4.449030  | 1.624475  | -1.94961  | 0.0059                |

<sup>[a]</sup> In e.

## References

1. Scherer, M. K.; Trendelkamp-Schroer, B.; Paul, F.; Pérez-Hernández, G.; Hoffmann, M.; Plattner, N.; Wehmeyer, C.; Prinz, J.-H.; Noé, F., PyEMMA 2: A Software Package for Estimation, Validation, and Analysis of Markov Models. *J. Chem. Theory Comput.* **2015**, *11* (11), 5525-5542.
2. Frisch, M. J.; Trucks, G. W.; Schlegel, H. B.; Scuseria, G. E.; Robb, M. A.; Cheeseman, J. R.; Scalmani, G.; Barone, V.; Mennucci, B.; Petersson, G. A.; Nakatsuji, H.; Caricato, M.; Li, X.; Hratchian, H. P.; Izmaylov, A. F.; Bloino, J.; Zheng, G.; Sonnenberg, J. L.; Hada, M.; Ehara, M.; Toyota, K.; Fukuda, R.; Hasegawa, J.; Ishida, M.; Nakajima, T.; Honda, Y.; Kitao, O.; Nakai, H.; Vreven, T.; Montgomery, J. A., Jr.; Peralta, J. E.; Ogliaro, F.; Bearpark, M.; Heyd, J. J.; Brothers, E.; Kudin, K. N.; Staroverov, V. N.; Kobayashi, R.; Normand, J.; Raghavachari, K.; Rendell, A.; Burant, J. C.; Iyengar, S. S.; Tomasi, J.; Cossi, M.; Rega, N.; Millam, J. M.; Klene, M.; Knox, J. E.; Cross, J. B.; Bakken, V.; Adamo, C.; Jaramillo, J.; Gomperts, R.; Stratmann, R. E.; Yazyev, O.; Austin, A. J.; Cammi, R.; Pomelli, C.; Ochterski, J. W.; Martin, R. L.; Morokuma, K.; Zakrzewski, V. G.; Voth, G. A.; Salvador, P.; Dannenberg, J. J.; Dapprich, S.; Daniels, A. D.; Farkas, Ö.; Foresman, J. B.; Ortiz, J. V.; Cioslowski, J.; Fox, D. J. *Gaussian 09*, Revision A.02; Gaussian, Inc.: Wallingford CT, 2016.
3. Wang, J.; Wang, W.; Kollman, P. A.; Case, D. A., Automatic atom type and bond type perception in molecular mechanical calculations. *J. Mol. Graph. Model.* **2006**, *25* (2), 247-260.
4. Miller, B. R.; McGee, T. D.; Swails, J. M.; Homeyer, N.; Gohlke, H.; Roitberg, A. E., MMPBSA.py: An Efficient Program for End-State Free Energy Calculations. *J. Chem. Theory Comput.* **2012**, *8* (9), 3314-3321.
5. Roe, D. R.; Cheatham, T. E., PTRAJ and CPPTRAJ: Software for Processing and Analysis of Molecular Dynamics Trajectory Data. *J. Chem. Theory Comput.* **2013**, *9* (7), 3084-3095.
